# Supplementary material for: Rolling circle RNA synthesis catalyzed by RNA
Source: eLife journal article supplement (doi:10.7554/elife.75186), 2022-02-02
Supplement: fig1-data1 [file Source data for Figure 1 - Quant. of gel 20201218.xlsx]

## Sheet: Sheet 1
	Raw quantification data
		Lane 1	Lane 1		Lane 2	Lane 2
		Volume	Band %		Volume	Band %
	9	7.9295e+06	14.44		1.33588e+06	3.67
	8	2.08691e+06	3.80		819147	2.25
	7	1.47726e+06	2.69		224965	0.62
	6	2.90984e+06	5.30		576659	1.59
	5	4.26879e+06	7.78		1.87801e+06	5.17
	4	5.8171e+06	10.60		3.75527e+06	10.33
	3	6.38412e+06	11.63		1.13094e+06	3.11
	2	5.62272e+06	10.24		5.91541e+06	16.27
	1	6.15777e+06	11.22		1.33107e+07	36.61
	Primer	7.26207e+06	13.23		6.84587e+06	18.83
	Calculated extension effiency					lin vs circ, 4 uL = 800 pmol GAA triplet
			Lin	Cir
		triplet, uL	4	4
		9	79.1651	61.989
		8	87.1472	90.5476
		7	79.7977	80.4962
		6	77.1384	61.1553
		5	76.2465	56.2829
		4	79.3217	88.3658
		3	84.5937	62.1687
		2	85.5634	54.017
		1	85.4514	80.8736
