# Supplementary material for: Rolling circle RNA synthesis catalyzed by RNA
Source: eLife journal article supplement (doi:10.7554/elife.75186), 2022-02-02
Supplement: fig2-data1 [file Source data for Figure 2 - Quant. of gel 20190211.xlsx]

## Sheet: data
	raw data
		data from gel:20190211																			data from gel: 20190127
		P10+3xGAA						P10						P10							P10+3GAA						P10
		16	12	11	10	9	8	16	12	11	10	9	8	16	12	11	10	9	8		16	12	11	10	9	8	16	12	11	10	9	8	L8
	16							5494.87						10686.8													1893.6
	15	794.57						9935.49						12587.6													2997.55
	14	2129.43						11165.8						12752.2							3166.4						3799.62
	13	11580.4						13831						15561.4							19656.9	10623.4					5143.68
	12	4429.64	3937.81					17383.6	14543.8					18174.9	22021.3						14267.1	10115.8					6641.27	4926.44
	11	8054.09	6281.34	2917.48				21683	13954.9	8660.77				22192.4	19801.2	26641.3					19342.6	13160.7		42004.7			8942.65	7513.31	9220.71
	10	13682.1	15519.5	9829	345.07			29141.1	21227.2	19636.4	39480.7			27595.5	27046.3	32340.3	33079.8				27797.5	16926.1	17280.5	31968.3			12362.7	14743.2	11576.2	2937.11
	9	16735.8	32884.3	25797.3	2481.71	4598.66		40991	20783.1	40782.4	33151.6	163232		38674	23818.8	56360.2	20877.4	91482.7			37661.7	28893.8	10366.8	18687.3	18939.3		17246.5	17129.8	22270.3	4177.19	30561.4
	8	20818.8	23646	82707.9	5684.16	7851.78	747.9	74900.3	21073.2	40543.4	49124.8	51449.7	33172.8	73014.9	26760.3	51643.2	35914.2	46224.8	34858.7		49549.1	19271.4	37286.4	17835.5	11943.6	6660.69	27459.8	15395.8	27935	5032.74	17974.2	88042.4	2068419
	7	31997.5	35055.1	45567.5	47774.9	15728.8	1393.95	151571	27209.2	48717	53859.7	86062.5	56717.6	148593	35776.2	60528.1	36099.1	67716.2	43958.3		71202.8	37393.5	31939.3	56736.1	9585.92	5766.26	42063	21148.8	35531.3	6117.94	30947.4	63480.5	2109482
	6	45555.9	57116.3	75429.3	25368.1	209095	3587.74	368340	32454	56278.2	58514.1	76642.3	67079.3	377409	46552.7	71472.2	37185.5	61561.4	52495.5		105148	107973	65887.8	39446.9	35867	4814.55	100290	21797.3	37390.4	6515.11	30000.2	34003.1	669985
	5	85849.9	84510.2	126708	49848.4	72717.6	21358.7	1114924	129896	150233	215828	127820	67377.6	1089618	251420	225572	126548	102556	53440.6		214377	77412.7	164888	99909.5	23742.3	14922.3	246090	64588.8	92739.5	13364.5	43466.4	32332.3	960072
	4	246129	109942	179195	91790.9	124828	36150.8	871183	321989	371262	609599	432323	238186	826480	563717	553106	386130	334293	191021		494833	280397	271945	162659	64923.7	6787.66	228823	117568	208098	32632.7	113796	56044.7	1197022
	3	291136	134538	176699	93481.1	199616	62934.4	600911	376502	466020	685292	729556	570688	454420	521665	579651	477294	558317	438134		569437	108949	199897	193844	171599	5763.4	175869	144880	244564	40002.7	200727	118257	1026728
	2	1338799	1627496	1.5691e+06	912857	709215	172270	1624697	1037194	1238327	1702404	1903804	1804423	1463016	1459810	1528514	1272885	1526862	1414360		1.86757e+06	881582	1.06821e+06	1.02136e+06	306096	41670.8	711811	448409	638259	147661	612391	461922	1232088
	1	4819870	8848475	9.11432e+06	7423807	7048494	4383528	5112214	4578129	5204693	6884969	7527963	7694406	4868832	5815070	6011984	5438199	6435156	6229857		5.9276e+06	5.1031e+06	7.89925e+06	8.49839e+06	4.41505e+06	1.12883e+06	2.73212e+06	2.04944e+06	2.61849e+06	1.24702e+06	3.19159e+06	3.23037e+06	1608066
	Primer	20294041	25645914	2.18064e+07	22217355	25266304	23912860	7738990	10645689	9309467	9743825	9131441	7283014	9927288	11382475	9775830	10913109	8978014	7184839		2.54778e+07	2.54622e+07	2.49647e+07	2.62057e+07	2.90868e+07	2.91023e+07	1.14905e+07	1.09299e+07	8.27852e+06	1.05157e+07	9.1991e+06	9.37072e+06	3939692
	Extension effiency
		P10+3xGAA						P10						P10							P10+3GAA						P10
		16	12	11	10	9	8	16	12	11	10	9	8	16	12	11	10	9	8		16	12	11	10	9	8	16	12	11	10	9	8	L8
	16							0.356108						0.459165							#DIV/0!						0.387148
	15	0.271741						0.580172						0.646034							0						0.562798
	14	0.201593						0.657878						0.698353							0.138735						0.628198
	13	0.766049						0.699302						0.739477							0.615342						0.675651
	12	0.70157	0.385336					0.727237	0.510332					0.758661	0.526543						0.657247	0.611777					0.696018	0.396024
	11	0.663584	0.397036	0.228885				0.731752	0.573116	0.306065				0.769173	0.607278	0.451688					0.669983	0.666979	0				0.704108	0.45763	0.443368
	10	0.708467	0.439054	0.330701	0.122072			0.726043	0.705241	0.409631	0.543569			0.755576	0.743021	0.511363	0.613075				0.691025	0.637558	0.625034	0.798325			0.707823	0.613435	0.482894	0.412846
	9	0.733859	0.712577	0.317883	0.332135	0.369357		0.666407	0.769898	0.630156	0.596534	0.760345		0.684246	0.775967	0.690731	0.600382	0.664326			0.710985	0.805322	0.425778	0.838587	0.613262		0.682499	0.742151	0.606562	0.585682	0.629669
	8	0.7097	0.701211	0.726845	0.151209	0.44183	0.349184	0.59699	0.770949	0.692327	0.693311	0.713835	0.369036	0.608794	0.769519	0.733958	0.713432	0.670358	0.442274		0.706554	0.725823	0.670297	0.660734	0.763128	0.535988	0.67279	0.738443	0.666478	0.665045	0.610641	0.58105	0.495086
	7	0.707559	0.672574	0.688629	0.689322	0.118762	0.373823	0.50521	0.785422	0.737775	0.750079	0.796913	0.572661	0.5016	0.769286	0.760951	0.772086	0.76942	0.600224		0.697671	0.558136	0.595186	0.809139	0.530142	0.720758	0.561746	0.787663	0.740207	0.737083	0.725983	0.816721	0.861798
	6	0.644702	0.673644	0.656577	0.620931	0.765421	0.211516	0.400373	0.53797	0.588235	0.520338	0.746995	0.699673	0.410016	0.44523	0.569977	0.563182	0.722476	0.710746		0.618661	0.759416	0.496755	0.674125	0.762762	0.536053	0.48184	0.613804	0.608138	0.649636	0.715812	0.85159	0.834697
	5	0.495386	0.701968	0.673093	0.588922	0.71292	0.428347	0.680949	0.466137	0.495645	0.424667	0.53887	0.48504	0.690844	0.445659	0.486754	0.428661	0.525041	0.491659		0.531852	0.534354	0.546451	0.653361	0.606528	0.82574	0.674854	0.587207	0.532113	0.538938	0.573392	0.795385	0.829118
	4	0.626218	0.732758	0.756227	0.704897	0.685365	0.501207	0.819625	0.61567	0.612339	0.607249	0.562376	0.447662	0.854714	0.660944	0.650247	0.586088	0.557646	0.461692		0.649887	0.846792	0.74997	0.707666	0.4902	0.871108	0.800064	0.662828	0.645213	0.6389	0.570612	0.698447	0.872166
	3	0.367803	0.236249	0.315984	0.257617	0.472173	0.422772	0.672186	0.485729	0.492584	0.506156	0.466854	0.364112	0.681314	0.513135	0.520215	0.475318	0.452544	0.365265		0.465493	0.446485	0.428062	0.393654	0.523732	0.517619	0.552723	0.489342	0.519233	0.428647	0.432899	0.45916	0.867
	2	0.30525	0.194084	0.201078	0.142097	0.160108	0.0637431	0.49225	0.305813	0.319217	0.333641	0.321735	0.269429	0.485303	0.340206	0.346368	0.308488	0.302359	0.263447		0.370851	0.237865	0.191227	0.165421	0.127072	0.0710865	0.368085	0.299945	0.336432	0.171668	0.252809	0.209106	0.852089
	1	0.254761	0.299776	0.34347	0.280312	0.249332	0.163735	0.565405	0.382524	0.450919	0.514654	0.548625	0.591188	0.487938	0.436398	0.484768	0.418814	0.506762	0.540698		0.269965	0.208215	0.281212	0.279837	0.148127	0.0400831	0.2734	0.211261	0.322798	0.125235	0.317096	0.30356	0.734012
	Primer	1	1	1	1	1	1	1	1	1	1	1	1	1	1	1	1	1	1		1	1	1	1	1	1	1	1	1	1	1	1	1
	Extension effiency	mean																SD	n:2					SD	n:3
		P10+3xGAA								P10								P10+3xGAA						F10
		16	12	11	10	9	8			16	12	11	10	9	8	L8		16	12	11	10	9	8	16	12	11	10	9	8
	16								16	0.400807							16							0.052869
	15	0.13587							15	0.596335							15	0.19215						0.0439085
	14	0.170164							14	0.661476							14	0.0444473						0.035216
	13	0.690696							13	0.70481							13	0.106566						0.0322673
	12	0.679408	0.498557						12	0.727305	0.477633						12	0.0313409	0.160118					0.0313216	0.0711386
	11	0.666784	0.532008	0.114443					11	0.735011	0.546008	0.400374					11	0.00452489	0.190879	0.161846				0.0326549	0.0784204	0.0817797
	10	0.699746	0.538306	0.477868	0.460198				10	0.729814	0.687232	0.467963	0.523163				10	0.0123336	0.140364	0.208125	0.478183			0.0240988	0.0666437	0.0524838	0.101662
	9	0.722422	0.758949	0.37183	0.585361	0.49131			9	0.677718	0.762672	0.642483	0.594199	0.68478			9	0.0161746	0.0655808	0.0762934	0.358116	0.172467		0.00983378	0.018029	0.0434175	0.00762329	0.0676961
	8	0.708127	0.713517	0.698571	0.405972	0.602479	0.442586		8	0.626191	0.759637	0.697587	0.690596	0.664945	0.46412	0.495086	8	0.00222457	0.0174032	0.0399852	0.360288	0.227192	0.13209	0.0407846	0.0183684	0.0340462	0.0243074	0.0518094	0.107682
	7	0.702615	0.615355	0.641907	0.74923	0.324452	0.54729		7	0.522852	0.78079	0.746311	0.753083	0.764105	0.663202	0.861798	7	0.00699217	0.0809198	0.0660736	0.0847236	0.290889	0.24532	0.0337318	0.0100259	0.0127366	0.0176939	0.0357622	0.133664
	6	0.631681	0.71653	0.576666	0.647528	0.764091	0.373785		6	0.430743	0.532335	0.588783	0.577719	0.728428	0.754003	0.834697	6	0.0184143	0.0606503	0.113011	0.0376135	0.00188041	0.229483	0.0445133	0.0844278	0.0190865	0.0658634	0.0164214	0.0846943
	5	0.513619	0.618161	0.609772	0.621142	0.659724	0.627043		5	0.682215	0.499668	0.504838	0.464089	0.545768	0.590695	0.829118	5	0.0257854	0.118521	0.0895497	0.0455652	0.0752307	0.281	0.00806989	0.0765	0.0240359	0.0648522	0.0249029	0.177298
	4	0.638053	0.789775	0.753098	0.706282	0.587783	0.686158		4	0.824801	0.64648	0.635933	0.610745	0.563545	0.535933	0.872166	4	0.0167363	0.0806343	0.00442461	0.00195841	0.138002	0.261559	0.0276903	0.0266995	0.0205872	0.0265791	0.00656127	0.140916
	3	0.416648	0.341367	0.372023	0.325636	0.497953	0.470195		3	0.635408	0.496069	0.510677	0.470041	0.450766	0.396179	0.867	3	0.0690776	0.148659	0.0792509	0.0961924	0.0364574	0.0670664	0.0717521	0.0148898	0.0156767	0.0390233	0.0170471	0.0545461
	2	0.338051	0.215975	0.196152	0.153759	0.14359	0.0674148		2	0.448546	0.315321	0.334005	0.271266	0.292301	0.247327	0.852089	2	0.0463867	0.030958	0.00696569	0.016492	0.0233603	0.00519259	0.069768	0.0217492	0.0137374	0.0871659	0.0355467	0.0332358
	1	0.262363	0.253996	0.312341	0.280074	0.19873	0.101909		1	0.442248	0.343394	0.419495	0.352901	0.457494	0.478482	0.734012	1	0.0107503	0.0647433	0.0440237	0.000335621	0.0715628	0.087435	0.15127	0.117558	0.0854351	0.202905	0.123377	0.153576
	average eficiency	0.581935	0.562112	0.510813	0.515875	0.533258	0.475565		mean
		0.0498752	0.0316156	0.0444232	0.0797122	0.0634626	0.100726		SD	n:5
			size effect, avarage efficiency
			size, nt	mean	SD	n
			58	0.581935	0.0498752	5
			46	0.562112	0.0316156	5
			43	0.510813	0.0444232	5
			40	0.515875	0.0797122	5
			37	0.533258	0.0634626	5
			34	0.475565	0.100726	5
			linear 34	0	0
