# Supplementary material for: Rolling circle RNA synthesis catalyzed by RNA
Source: eLife journal article supplement (doi:10.7554/elife.75186), 2022-02-02
Supplement: fig2-data1 [file Source data for Figure 2 - Quant. of gel 20191001.xlsx]

## Sheet: Sheet 1
Raw Data
Ref Band	Lane 1	Lane 1	Lane 1	Lane 1	Lane 2	Lane 2	Lane 2	Lane 2	Lane 3	Lane 3	Lane 3	Lane 3	Lane 4	Lane 4	Lane 4	Lane 4	Lane 5	Lane 5	Lane 5	Lane 5	Lane 6	Lane 6	Lane 6	Lane 6	Lane 7	Lane 7	Lane 7	Lane 7	Lane 8	Lane 8	Lane 8	Lane 8	Lane 9	Lane 9	Lane 9	Lane 9	Lane 10	Lane 10	Lane 10	Lane 10
Number	Band No	Volume	Vol+BkGnd	Band %	Band No	Volume	Vol+BkGnd	Band %	Band No	Volume	Vol+BkGnd	Band %	Band No	Volume	Vol+BkGnd	Band %	Band No	Volume	Vol+BkGnd	Band %	Band No	Volume	Vol+BkGnd	Band %	Band No	Volume	Vol+BkGnd	Band %	Band No	Volume	Vol+BkGnd	Band %	Band No	Volume	Vol+BkGnd	Band %	Band No	Volume	Vol+BkGnd	Band %
1	1	16278.1	241891.97	0.05	1	16118.1	239249.64	0.05	1	12155.3	230735.25	0.04	1	9043.78	225725.03	0.03	1	6317.35	220481.12	0.02	1	6570	218027.85	0.02
2	2	15622.1	242032.35	0.05	2	16401.8	240297.20	0.06	2	12013.3	231415.28	0.04	2	9107.65	226729.81	0.03	2	5646.61	220612.22	0.02	2	6523.84	219037.58	0.02
3	3	14197.5	241631.61	0.04	3	13601.7	238165.52	0.05	3	10790.9	231014.88	0.04	3	7990.72	226344.69	0.03	3	5308.11	221419.21	0.02	3	5585.19	218920.16	0.02
5	4	17774.2	246459.68	0.05	4	16441.8	242055.96	0.06	4	13854.3	235105.83	0.05	4	11462.6	230862.00	0.04	4	7248.93	224276.42	0.02	4	8712.04	223220.22	0.03
6	5	21519.1	250773.32	0.07	5	23073.6	249356.24	0.08	5	17653	239521.10	0.06	5	14499.5	234526.18	0.05	5	10513.9	228515.07	0.04	5	11877	227206.43	0.04	1	7778.62	218177.40	0.03	1	7922.01	215334.86	0.03
7	6	21313.9	251591.96	0.07	6	23841	250983.04	0.08	6	19006.2	241901.79	0.06	6	15971	237043.12	0.06	6	11815	230732.54	0.04	6	12563.2	228948.47	0.04	2	8723.13	220275.19	0.03	2	7703.24	216037.26	0.03
8	7	27360.6	258890.02	0.08	7	25920.5	254017.44	0.09	7	22086.5	246009.72	0.07	7	18280.4	240398.00	0.07	7	14565.1	234685.45	0.05	7	16099.8	233775.64	0.06	3	10833	223538.39	0.04	3	10272.6	219988.37	0.04
9	8	43273.4	276168.02	0.13	8	50541.8	279880.04	0.17	8	38317.9	263474.10	0.13	8	30773.8	254145.95	0.11	8	26636.1	248131.03	0.09	8	25461.7	244428.06	0.09	4	20042.9	234132.15	0.07	4	16916.8	227899.22	0.06	1	23696.9	231878.85	0.09	1	14253	218792.62	0.05
10	9	31996.1	266369.57	0.10	9	36129.9	266613.97	0.12	9	42656.9	269251.69	0.14	9	26548.6	251279.78	0.10	9	19563.9	242490.66	0.07	9	24306.8	244915.61	0.08	5	19799.8	235388.33	0.07	5	17323.7	229802.99	0.06	2	19771.3	229467.34	0.07	2	26417.9	232667.83	0.10
11	10	28511.4	264591.26	0.09	10	33808.2	265724.62	0.11	10	45237	273270.32	0.15	10	29093.2	255392.55	0.11	10	16066.1	240653.82	0.05	10	21163.3	243414.61	0.07	6	16873.7	234076.77	0.06	6	16009.9	230216.37	0.06	3	16571.2	228014.36	0.06	3	24868.4	232950.92	0.09
12	11	68206.4	306390.86	0.21	11	59069.2	292561.11	0.20	11	77065.6	306794.36	0.25	11	52703.7	280832.60	0.19	11	38423.8	265016.11	0.13	11	43929.1	268233.47	0.15	7	31671.3	250892.68	0.11	7	30926	247147.58	0.11	4	19979.6	233344.51	0.07	4	25144	235181.21	0.10
13	12	992388	1232620.25	3.06	12	959272	1194673.31	3.23	12	710658	942390.73	2.34	12	651221	881335.78	2.35	12	595737	824563.38	2.04	12	554031	780505.75	1.93	8	390006	611418.86	1.33	8	371148	589442.35	1.35	5	126567	341853.71	0.46	5	109629	321681.84	0.42
14	13	2.79865e+06	3041382.64	8.62	13	2.71914e+06	2956643.56	9.15	13	2.11588e+06	2349922.54	6.97	13	1.89901e+06	2131477.35	6.85	13	1.70855e+06	1939891.69	5.85	13	1.59186e+06	1820916.92	5.55	9	1.14899e+06	1372943.40	3.93	9	1.10063e+06	1321461.49	4.00	6	580662	798744.57	2.09	6	541055	756100.62	2.05
15	14	1.30418e+06	1549811.55	4.02	14	1.27429e+06	1514226.07	4.29	14	1.09694e+06	1333607.65	3.62	14	985109	1220242.38	3.56	14	936756	1171080.04	3.21	14	906275	1138380.90	3.16	10	725094	951984.66	2.48	10	690870	914633.95	2.51	7	445562	666672.27	1.61	7	197407	415141.01	0.75
16	15	265138	514072.87	0.82	15	275255	518057.11	0.93	15	230256	469900.33	0.76	15	183884	421996.47	0.66	15	177014	414545.88	0.61	15	195205	430713.77	0.68	11	172422	402656.72	0.59	11	177868	405086.16	0.65	8	93752.9	318008.00	0.34	8	101942	323463.44	0.39
17	16	1.68722e+06	1940141.17	5.20	16	1.56565e+06	1811696.22	5.27	16	1.43575e+06	1678986.00	4.73	16	1.33177e+06	1573644.97	4.81	16	1.35368e+06	1595330.61	4.63	16	1.35529e+06	1594962.67	4.72	12	1.14409e+06	1378420.88	3.91	12	1.08218e+06	1313313.82	3.93	9	839010	1067575.00	3.02	9	808558	1034476.72	3.07
18	17	3.71835e+06	3975533.02	11.45	17	3.4727e+06	3722376.28	11.69	17	3.39415e+06	3641296.63	11.19	17	3.05893e+06	3304721.98	11.04	17	3.256e+06	3502006.70	11.14	17	3.18618e+06	3430256.59	11.10	13	2.91405e+06	3152703.23	9.97	13	2.79523e+06	3030739.97	10.15	10	2.21414e+06	2447125.78	7.98	10	2.11406e+06	2344680.98	8.02
19	18	3.27565e+06	3537719.74	10.09	18	3.10455e+06	3358564.04	10.45	18	2.91084e+06	3163695.33	9.59	18	2.65043e+06	2900779.06	9.57	18	2.70228e+06	2953274.29	9.25	18	2.52243e+06	2771603.35	8.79	14	2.54022e+06	2783886.44	8.69	14	2.37524e+06	2615695.64	8.62	11	2.17737e+06	2415364.16	7.85	11	2.00593e+06	2241809.08	7.61
20	19	7.991e+06	8258711.37	24.61	19	7.15269e+06	7420223.67	24.08	19	7.53489e+06	7796592.30	24.84	19	6.8925e+06	7148257.25	24.88	19	7.33837e+06	7595264.52	25.11	19	7.37915e+06	7634472.15	25.71	15	7.37407e+06	7623659.75	25.23	15	6.97825e+06	7224692.81	25.33	12	6.65158e+06	6895639.85	23.98	12	6.34223e+06	6584518.31	24.05
21	20	9.63263e+06	9905745.12	29.67	20	8.4797e+06	8761293.59	28.54	20	1.00665e+07	10337396.04	33.18	20	9.28069e+06	9542117.67	33.50	20	1.03742e+07	10637227.20	35.50	20	1.01919e+07	10453439.17	35.51	16	1.17627e+07	12017183.45	40.24	16	1.10201e+07	11273018.55	40.01	13	1.29367e+07	13188575.23	46.63	13	1.25547e+07	12806160.65	47.61
22	21	499945	778472.20	1.54	21	390981	686504.23	1.32	21	532657	812744.61	1.76	21	544475	811523.40	1.97	21	622153	891242.55	2.13	21	635180	902973.82	2.21	17	945226	1204576.29	3.23	17	846139	1106108.14	3.07	14	1.59605e+06	1856000.84	5.75	14	1.50241e+06	1765026.88	5.70
	Amount of product, pmol													Extension effiency, %
	week	6	6	4	4	3	3	2	2	1	1			week	6	6	4	4	3	3	2	2	1	1
	rep	1	2	1	2	1	2	1	2	1	2			rep	1	2	1	2	1	2	1	2	1	2
	20	0.00250654	0.00271265	0.00200322	0.00163225	0.00108074	0.00114459	0	0	0	0			20	51.0281	49.5639	50.2938	49.8241	52.8032	50.1763
	19	0.00491208	0.00547304	0.00398305	0.00327602	0.00204674	0.00228113	0	0	0	0			19	69.2012	70.5091	69.1332	69.4336	69.2677	70.0991
	18	0.00709826	0.00776218	0.00576141	0.00471821	0.00295483	0.00325415	0	0	0	0			18	72.1721	73.7198	71.6181	69.5182	70.4379	68.1939
	17	0.00983518	0.0105293	0.00804463	0.006787	0.00419494	0.00477191	0	0	0	0			17	74.7994	73.0565	73.4408	72.1721	69.9902	69.754
	16	0.0131487	0.0144125	0.0109539	0.00940391	0.00599362	0.00684105	0.00133047	0.00143803	0	0			16	80.0254	78.223	77.7635	76.5392	74.7812	75.7614	47.1382	50.7001
	15	0.0164307	0.0184249	0.0140862	0.0122864	0.00801488	0.00902973	0.00282249	0.00283634	0	0			15	79.5916	80.8561	79.4657	78.8312	76.2841	76.2998	60.369	60.3342
	14	0.0206438	0.0227873	0.0177261	0.0155857	0.0105066	0.0118345	0.0046754	0.00470105	0	0			14	75.5985	72.8183	73.7328	73.7266	69.7493	72.737	57.6955	60.4882
	13	0.0273071	0.0312934	0.024041	0.0211398	0.0150634	0.0162703	0.00810357	0.00777184	0.00427104	0.00270265			13	84.7154	83.7304	77.3745	81.5222	81.8205	79.3485	70.5261	71.1936	54.5155	35.0448
	12	0.032234	0.037374	0.0310709	0.0259314	0.0184103	0.0205049	0.0114902	0.0109165	0.00783453	0.00771199			12	88.0127	86.7874	80.649	83.1609	87.0101	84.7596	79.9245	78.9754	72.3994	62.0557
	11	0.0366242	0.0430639	0.0385261	0.0311822	0.0211588	0.0241919	0.0143763	0.0138227	0.0108213	0.0124275			11	77.7142	81.2448	75.2071	76.6255	76.297	75.9677	72.6316	71.1172	75.0315	72.2727
	10	0.0471268	0.0530051	0.0512267	0.0406943	0.0277322	0.0318449	0.0197934	0.0194364	0.0144223	0.0171953			10	23.5708	24.7169	30.4296	25.7187	21.3903	24.8081	22.8823	22.3901	38.734	45.271
	9	0.199937	0.214449	0.168345	0.158228	0.129648	0.128365	0.0865008	0.0868083	0.0372342	0.0379831			9	31.6918	31.9084	32.5589	31.5846	30.7268	31.6412	30.5628	30.2892	26.2415	27.0193
	8	0.63088	0.672075	0.517047	0.500967	0.421939	0.405689	0.283027	0.286598	0.141891	0.140578			8	75.8543	75.8092	74.094	73.806	72.4738	71.985	69.5315	69.5615	63.858	78.9718
	7	0.831701	0.886536	0.697826	0.678762	0.582195	0.563575	0.407048	0.412007	0.222197	0.17801			7	95.3209	95.0341	94.8426	95.3385	95.0557	94.3092	93.2443	92.7329	92.9326	90.2046
	6	0.872527	0.932861	0.735773	0.71195	0.612478	0.597583	0.43654	0.444294	0.239094	0.19734			6	77.0559	77.9752	75.6666	74.7602	72.5634	71.679	69.0479	69.3414	61.2569	56.277
	5	1.13233	1.19636	0.972387	0.952311	0.844058	0.833693	0.632227	0.640735	0.390314	0.350658			5	66.4166	67.1806	63.482	63.302	60.2434	60.031	55.9171	55.8067	49.4456	46.6596
	4	1.70489	1.78081	1.53175	1.50439	1.40108	1.38877	1.13065	1.14813	0.789381	0.751525			4	77.1694	77.3156	76.1511	75.8741	75.1905	75.9633	72.2399	72.6992	66.7936	66.3956
	3	2.20928	2.30329	2.01146	1.98275	1.86337	1.82821	1.56514	1.57929	1.18182	1.13189			3	64.2279	65.6756	61.8297	61.4477	59.7467	58.7139	55.3754	55.4916	49.6422	48.4853
	2	3.43976	3.50708	3.25323	3.22673	3.11879	3.11376	2.82641	2.846	2.38068	2.3345			2	69.871	71.077	66.2274	65.8283	63.7325	63.6847	58.4171	58.724	50.5201	49.5109
	1	4.92302	4.9342	4.91222	4.90173	4.89356	4.88934	4.83833	4.84641	4.71234	4.71511			1	98.4603	98.684	98.2443	98.0346	97.8713	97.7869	96.7665	96.9281	94.2467	94.3023
	Amount of product, pmol													Extension effiency, %
		mean						SD							mean						SD
	week	6	4	3	2	1		6	4	3	2	1		week	6	4	3	2	1		6	4	3	2	1
	20	0.0026096	0.00181773	0.00111267				0.000145741	0.00050164	0.000262321				20	50.296	50.0589	51.4897				1.03538	0.516119	0.332132
	19	0.00519256	0.00362953	0.00216394				0.000396659	0.00105359	0.000499943				19	69.8551	69.2834	69.6834				0.924793	0.972892	0.2124
	18	0.00743022	0.00523981	0.00310449				0.000469464	0.00141476	0.000737656				18	72.946	70.5682	69.3159				1.09442	1.48615	1.48481
	17	0.0101822	0.00741581	0.00448343				0.000490813	0.00175693	0.000889274				17	73.9279	72.8065	69.8721				1.23243	0.271786	0.89711
	16	0.0137806	0.0101789	0.00641733	0.00138425			0.00089364	0.00244564	0.001096	0.00241144			16	79.1242	77.1514	75.2713	48.9191			1.2745	0.324888	0.865739	1.24311
	15	0.0174278	0.0131863	0.0085223	0.00282942			0.00141014	0.00306799	0.00127262	0.00302042			15	80.2239	79.1485	76.2919	60.3516			0.894108	0.983144	0.44866	1.8011
	14	0.0217155	0.0166559	0.0111706	0.00468822			0.00151573	0.00357885	0.00151347	0.00359145			14	74.2084	73.7297	71.2431	59.0919			1.96589	0.646678	0.00435846	2.81244
	13	0.0293003	0.0225904	0.0156669	0.00793771	0.00348684		0.00281874	0.00512827	0.00205139	0.00429669	0.000853425		13	84.2229	79.4483	80.5845	70.8599	44.7801		0.696457	4.49435	2.93288	0.210939	1.74799
	12	0.034804	0.0285012	0.0194576	0.0112033	0.00777326		0.00363456	0.00445696	0.00363418	0.00531822	0.00148111		12	87.4	81.9049	85.8848	79.45	67.2276		0.86642	4.34047	1.77612	2.7218	1.59134
	11	0.039844	0.0348542	0.0226753	0.0140995	0.0116244		0.00455352	0.0032087	0.00519289	0.00708761	0.00214467		11	79.4795	75.9163	76.1323	71.8744	73.6521		2.4965	4.2693	1.00296	0.232283	0.232809
	10	0.050066	0.0459605	0.0297886	0.0196149	0.0158088		0.00415657	0.00125753	0.00744749	0.00916561	0.00290812		10	24.1439	28.0742	23.0992	22.6362	42.0025		0.810423	4.03948	3.33108	3.06064	2.41674
	9	0.207193	0.163287	0.129007	0.0866546	0.0376087		0.0102611	0.0326003	0.00715349	0.0202092	0.000907535		9	31.8001	32.0718	31.184	30.426	26.6304		0.153194	0.459961	0.68895	0.606552	0.646549
	8	0.651478	0.509007	0.413814	0.284813	0.141234		0.0291291	0.109622	0.0113704	0.0558813	0.01149		8	75.8317	73.95	72.2294	69.5465	71.4149		0.0318862	1.21282	0.203653	0.941974	0.345666
	7	0.859118	0.688294	0.572885	0.409528	0.200103		0.0387741	0.133438	0.0134803	0.0682833	0.013166		7	95.1775	95.0905	94.6824	92.9886	91.5686		0.202781	0.13541	0.350626	0.199951	0.527878
	6	0.902694	0.723861	0.60503	0.440417	0.218217		0.042662	0.139362	0.0168453	0.0703374	0.0105323		6	77.5155	75.2134	72.1212	69.1946	58.767		0.650021	1.63236	0.640939	1.55337	0.625394
	5	1.16434	0.962349	0.838876	0.636481	0.370486		0.0452729	0.15837	0.0141959	0.0765461	0.00732933		5	66.7986	63.392	60.1372	55.8619	48.0526		0.540281	2.61531	0.127326	2.16273	0.150192
	4	1.74285	1.51807	1.39493	1.13939	0.770453		0.0536787	0.176108	0.0193448	0.0730539	0.00870386		4	77.2425	76.0126	75.5769	72.4695	66.5946		0.103336	0.823431	0.195867	0.483371	0.546475
	3	2.25629	1.99711	1.84579	1.57221	1.15685		0.0664753	0.206355	0.0203034	0.084412	0.024863		3	64.9517	61.6387	59.2303	55.4335	49.0638		1.02368	2.71942	0.270104	1.20282	0.73028
	2	3.47342	3.23998	3.11628	2.83621	2.35759		0.0476025	0.179497	0.0187415	0.0763229	0.00355467		2	70.474	66.0279	63.7086	58.5705	50.0155		0.852787	3.42919	0.282172	1.48198	0.0337869
	1	4.92861	4.90697	4.89145	4.84237	4.71372		0.00790639	0.0155434	0.00741416	0.00577476	0.00298547		1	98.5722	98.1395	97.8291	96.8473	94.2745		0.158128	0.310869	0.148283	0.115495	0.0597095
