# Supplementary material for: Rolling circle RNA synthesis catalyzed by RNA
Source: eLife journal article supplement (doi:10.7554/elife.75186), 2022-02-02
Supplement: fig2-figsupp1-data1 [file Source data for Figure 2, Fig. suppl. 1A - Quant. of gel 20200106.xlsx]

## Sheet: Sheet 1
Ref Band	Lane 1	Lane 1	Lane 1	Lane 2	Lane 2	Lane 2
Number	Band No	Volume	Band %	Band No	Volume	Band %
1	1	83294.6	0.65	1	569593	3.81
2	2	154262	1.21	2	279916	1.87
3	3	111747	0.87	3	212129	1.42
4	4	110205	0.86	4	447083	2.99
5	5	271883	2.13	5	681986	4.56
6	6	499384	3.91	6	848659	5.67
7	7	602337	4.71	7	1.16915e+06	7.82
8	8	1.25348e+06	9.80	8	1.52861e+06	10.22
9	9	2.60875e+06	20.40	9	2.28943e+06	15.31
10	10	7.09234e+06	55.46	10	6.93007e+06	46.33
		x1
		circular	linear
	9	35.063	67.0497
	8	68.0087	80.0187
	7	76.0168	70.3667
	6	62.8266	68.8691
	5	59.4253	72.0777
	4	67.1413	72.2194
	3	59.3896	73.3559
	2	54.195	71.4768
	1	44.5377	53.6655
