# Supplementary material for: Rolling circle RNA synthesis catalyzed by RNA
Source: eLife journal article supplement (doi:10.7554/elife.75186), 2022-02-02
Supplement: fig2-figsupp1-data1 [file Source data for Figure 2, Fig. suppl. 1B - Quant. of gel 20190916.xlsx]

## Sheet: Sheet 1
Ref Band	Lane 1	Lane 1	Lane 1	Lane 1	Lane 2	Lane 2	Lane 2	Lane 2	Lane 3	Lane 3	Lane 3	Lane 3
Number	Band No	Volume	Vol+BkGnd	Band %	Band No	Volume	Vol+BkGnd	Band %	Band No	Volume	Vol+BkGnd	Band %
12	9	2376183	3394248.85	2.38	9	48420.6	1303056.62	0.09	9	141134	1171050.46	0.17
13	8	7.16171e+06	8684560.92	7.16	8	146626	1370810.08	0.26	8	240913	1614983.83	0.30
14	7	3.35296e+06	4599054.29	3.35	7	49709.8	1147765.87	0.09	7	67429.1	1172303.00	0.08
15	6	725789	1637421.02	0.73	6	163992	1327227.60	0.29	6	136466	1017339.46	0.17
16	5	5.44039e+06	6886915.02	5.44	5	329256	1368310.45	0.58	5	322006	1372476.08	0.40
17	4	1.13249e+07	13016088.65	11.32	4	332427	1294067.37	0.59	4	599237	1471157.93	0.74
18	3	9.53495e+06	11164723.23	9.53	3	384628	1273902.77	0.68	3	1.32024e+06	2170135.71	1.63
19	2	2.44303e+07	26395411.08	24.42	2	7.27935e+06	8809749.44	12.89	2	7.94438e+06	9434544.58	9.80
20	1	3.28049e+07	34979217.24	32.79	1	3.01755e+07	32324678.97	53.43	1	2.1265e+07	23293156.15	26.24
21	Primer	2.08652e+06	3277147.70	2.09	Primer	17565226	19599409.20	31.10	Primer	4.89993e+07	51947646.87	60.45
		GAA	CGG	GAC
	9	24.9131	24.8252	36.9415
	8	73.9896	79.69	84.9983
	7	94.6698	59.8795	76.71
	6	71.4521	55.3856	64.5348
	5	62.7249	68.9446	60.2413
	4	76.113	73.5662	53.3059
	3	62.0336	16.6589	26.2484
	2	66.2334	22.4478	33.6233
	1	97.8975	68.8974	39.534
	primer
