# Supplementary material for: Rolling circle RNA synthesis catalyzed by RNA
Source: eLife journal article supplement (doi:10.7554/elife.75186), 2022-02-02
Supplement: fig2-figsupp1-data1 [file Source data for Figure 2, Fig. suppl. 1B - Quant. of gel 20201102.xlsx]

## Sheet: Sheet 1
Ref Band	Lane 1	Lane 1	Lane 1	Lane 2	Lane 2	Lane 2	Lane 3	Lane 3	Lane 3	Lane 4	Lane 4	Lane 4	Lane 5	Lane 5	Lane 5	Lane 6	Lane 6	Lane 6	Lane 7	Lane 7	Lane 7	Lane 8	Lane 8	Lane 8	Lane 9	Lane 9	Lane 9
Number	Band No	Volume	Band %	Band No	Volume	Band %	Band No	Volume	Band %	Band No	Volume	Band %	Band No	Volume	Band %	Band No	Volume	Band %	Band No	Volume	Band %	Band No	Volume	Band %	Band No	Volume	Band %
1
2	9	8264	0.13	1	64766.2	3.19	1	384641	3.41	1	10099.3	0.11	1	58721	3.05	1	212229	2.03	1	13313.2	0.22	1	48557	0.87	1	142466	2.20
3	8	7241	0.12	2	18023.9	0.89	2	166916	1.48	2	5701.19	0.06	2	17830.1	0.92	2	109146	1.05	2	5294.61	0.09	2	12180.6	0.22	2	79029.2	1.22
4	7	3624	0.06	3	7642.6	0.38	3	57647.4	0.51	3	3493.51	0.04	3	5211.21	0.27	3	33723.1	0.32	3	2863.69	0.05	3	5443.48	0.10	3	23227.8	0.36
5	6	6135	0.10	4	22287.8	1.10	4	236371	2.10	4	6200	0.07	4	19795.5	1.03	4	124974	1.20	4	7896.2	0.13	4	29248.7	0.52	4	80844.4	1.25
6	5	13627	0.22	5	37003.1	1.82	5	818393	7.26	5	17822.6	0.19	5	31036.6	1.61	5	464520	4.45	5	19063.6	0.31	5	72817	1.30	5	298857	4.61
7	4	15422.8	0.25	6	64684.1	3.18	6	868181	7.70	6	22584.5	0.24	6	58321.3	3.03	6	598156	5.73	6	22825	0.37	6	138663	2.48	6	463193	7.14
8	3	23142.9	0.38	7	90904.2	4.47	7	225826	2.00	7	32559	0.35	7	89117.7	4.62	7	183367	1.76	7	31586.3	0.51	7	183646	3.28	7	122051	1.88
9	2	504319	8.18	8	268721	13.22	8	2.20269e+06	19.53	8	743010	8.00	8	236761	12.28	8	1.63731e+06	15.68	8	649526	10.58	8	1.15299e+06	20.59	8	1.10767e+06	17.07
10	1	2.72163e+06	44.14	9	565357	27.81	9	4.82124e+06	42.75	9	4.51217e+06	48.56	9	503270	26.10	9	4.38432e+06	42.00	9	2.96856e+06	48.35	9	2.28787e+06	40.86	9	2.68074e+06	41.32
11	p	2.86245e+06	46.42	10	893838	43.96	10	1.49584e+06	13.26	10	3.93805e+06	42.38	10	907846	47.09	10	2692228	25.79	10	2.41824e+06	39.39	10	1.66849e+06	29.79	10	1.48962e+06	22.96
	9	53.2989			78.2294			69.7373			63.9176			76.7083			66.0378			71.5464			79.9455			64.3202
	8	81.0549			91.5489			90.5373			81.8933			93.6264			90.5032			86.6629			91.7749			90.5085
	7	75.7164			80.2274			72.0461			75.6805			80.5082			73.9676			73.1127			69.3506			75.1682
	6	64.961			75.2857			50.8168			58.8551			76.5928			50.8232			60.6379			56.7201			52.1388
	5	71.6043			69.8313			65.7137			65.7297			69.4518			61.2279			67.9677			54.8196			57.4121
	4	70.1215			70.2258			91.8119			66.9318			68.176			89.3769			69.2867			62.5637			89.9104
	3	13.3138			53.1872			55.5969			11.701			54.1866			51.3202			13.6692			29.8475			52.2008
	2	17.6114			50.3808			50.7126			15.7177			50.6629			43.4116			20.2199			41.8054			46.3645
	1	53.5758			56.0385			86.7364			57.6175			52.9104			74.2123			60.6096			70.205			77.0393
	mean					SD
		CGG	GAC	GAA			CGG	GAC	GAA
	9	62.921	78.2944	66.6984		9	9.16445	1.61958	2.76835
	8	83.2037	92.3167	90.5163		8	3.02491	1.13983	0.0183303
	7	74.8366	76.6954	73.7273		7	1.49303	6.36233	1.57483
	6	61.4847	69.5329	51.2596		6	3.13982	11.1154	0.761433
	5	68.4339	64.7009	61.4512		5	2.96491	8.55954	4.15527
	4	68.78	66.9885	90.3664		4	1.65413	3.96668	1.27995
	3	12.8947	45.7404	53.0393		3	1.04893	13.7728	2.25827
	2	17.8497	47.6164	46.8296		2	2.26055	5.03443	3.67264
	1	57.2676	59.718	79.3293		1	3.52996	9.21577	6.5686
