# Supplementary material for: Rolling circle RNA synthesis catalyzed by RNA
Source: eLife journal article supplement (doi:10.7554/elife.75186), 2022-02-02
Supplement: fig2-figsupp1-data1 [file Source data for Figure 2, Fig. suppl. 1C - Quant. of gel 20190605.xlsx]

## Sheet: Sheet 1
	Raw data
Ref Band	Lane 1	Lane 1	Lane 1	Lane 1	Lane 2	Lane 2	Lane 2	Lane 2	Lane 3	Lane 3	Lane 3	Lane 3	Lane 4	Lane 4	Lane 4	Lane 4	Lane 5	Lane 5	Lane 5	Lane 5	Lane 7	Lane 7	Lane 7	Lane 7	Lane 8	Lane 8	Lane 8	Lane 8	Lane 9	Lane 9	Lane 9	Lane 9	Lane 10	Lane 10	Lane 10	Lane 10	Lane 11	Lane 11	Lane 11	Lane 11
Number	Band No	Volume	Vol+BkGnd	Band %	Band No	Volume	Vol+BkGnd	Band %	Band No	Volume	Vol+BkGnd	Band %	Band No	Volume	Vol+BkGnd	Band %	Band No	Volume	Vol+BkGnd	Band %	Band No	Volume	Vol+BkGnd	Band %	Band No	Volume	Vol+BkGnd	Band %	Band No	Volume	Vol+BkGnd	Band %	Band No	Volume	Vol+BkGnd	Band %	Band No	Volume	Vol+BkGnd	Band %
14																					1	4263.17	168936.06	0.01
13	1	5382.09	194449.93	0.01	1	3900.06	224916.89	0.01	1	2651.39	229781.83	0.01									2	6042.35	192156.30	0.01	1	1965.61	103543.34	0.00	1	1875.46	222404.72	0.01
12	2	6589.62	230675.51	0.02	2	4977.87	161038.69	0.01	2	5570.04	266326.89	0.01	1	2080.41	174176.95	0.00					3	7996.78	164246.94	0.02	2	3704.96	126441.26	0.01	2	2274.33	193653.09	0.01	1	2412.05	130869.80	0.01
11	3	9830.53	201646.25	0.02	3	10701.9	190534.64	0.02	3	6684.24	159285.60	0.02	2	4806.59	155944.12	0.01					4	17453.4	195584.28	0.04	3	8644.13	152820.02	0.02	3	6489.76	97652.89	0.02	2	4650.07	183218.08	0.01	1	5021.49	223464.90	0.02
10	4	22104.3	272478.16	0.05	4	25163.8	263344.30	0.05	4	14411.5	167687.75	0.04	3	14021.4	187581.70	0.03					5	29754.2	198504.59	0.07	4	18052.5	184095.65	0.05	4	11742.2	184925.71	0.03	3	11185.8	170705.98	0.04	2	9770.12	159566.02	0.03
9	5	169210	387710.83	0.41	5	194854	389918.96	0.40	5	186122	373267.51	0.45	4	187765	351460.17	0.42	1	24006.2	248624.26	0.06	6	223888	425901.55	0.51	5	190649	389594.84	0.48	5	165370	350199.12	0.44	4	147056	337662.85	0.47	3	124524	295511.96	0.40
8	6	400631	598130.14	0.97	6	479118	664796.91	0.99	6	465812	642912.86	1.13	5	489581	654274.19	1.10	2	67869.4	250733.48	0.16	7	536854	719174.74	1.23	6	442811	601294.14	1.12	6	395093	550223.03	1.06	5	362308	543964.78	1.16	4	330526	533144.51	1.06
7	7	216325	451579.22	0.52	7	235771	412162.93	0.49	7	206996	362946.37	0.50	6	218894	384772.40	0.49	3	51523.3	257349.66	0.12	8	302744	530197.78	0.70	7	237838	430189.69	0.60	7	184856	351817.88	0.49	6	151311	303763.43	0.49	5	154054	388998.53	0.49
6	8	139030	341712.68	0.34	8	168454	359528.28	0.35	8	157708	337301.56	0.38	7	147279	314592.06	0.33	4	35815.3	265155.28	0.08	9	185573	404744.35	0.43	8	151807	346632.23	0.39	8	130226	320059.60	0.35	7	112956	297460.80	0.36	6	118444	376339.61	0.38
5	9	1.1682e+06	1398494.50	2.82	9	1.41934e+06	1662516.17	2.94	9	1.2562e+06	1471351.73	3.05	8	1.41574e+06	1641052.35	3.17	5	425131	623590.95	0.99	10	1.24171e+06	1452659.08	2.85	9	1.2591e+06	1489826.63	3.20	9	1.18429e+06	1397828.23	3.16	8	956895	1143217.54	3.07	7	955387	1174560.74	3.06
4	10	2.91842e+06	3252324.94	7.06	10	3.44184e+06	3777343.57	7.13	10	3.11784e+06	3415458.91	7.58	9	3.43736e+06	3733830.87	7.69	6	1.18312e+06	1406129.78	2.75	11	3.21046e+06	3515304.95	7.38	10	2.92145e+06	3212311.52	7.41	10	2.77279e+06	3043607.24	7.41	9	2.36508e+06	2627029.52	7.60	8	2.32052e+06	2606245.56	7.43
3	11	2.35311e+06	2669999.25	5.69	11	3.1552e+06	3473480.03	6.53	11	2.44398e+06	2710484.04	5.94	10	2.74368e+06	3021230.33	6.14	7	1.77601e+06	2036010.69	4.12	12	2.59282e+06	2869201.65	5.96	11	2.41552e+06	2689582.44	6.13	11	2.25661e+06	2511431.08	6.03	10	1.92303e+06	2156737.35	6.18	9	1.82447e+06	2071730.83	5.84
2	12	1.05745e+07	11019905.07	25.57	12	1.22901e+07	12722049.08	25.45	12	1.05966e+07	10977631.20	25.75	11	1.16647e+07	12042458.30	26.09	8	7.30737e+06	7655773.16	16.96	13	1.09181e+07	11297629.91	25.10	12	1.02671e+07	10631000.83	26.05	12	9.85532e+06	10219686.13	26.33	11	8.31398e+06	8652815.02	26.70	10	8181867	8512273.61	26.19
1	13	1.99824e+07	20459102.85	48.31	13	2.30716e+07	23535993.60	47.77	13	2.00731e+07	20481568.92	48.78	12	2.17057e+07	22105244.83	48.56	9	1.95845e+07	19980573.96	45.45	14	2.02778e+07	20683351.16	46.61	13	1.86704e+07	19059182.68	47.38	13	1.81288e+07	18505376.10	48.44	12	1.52332e+07	15595524.68	48.93	11	1.53669e+07	15730395.63	49.20
P	14	3.39562e+06	3990621.48	8.21	14	3.79668e+06	4182270.97	7.86	14	2.61576e+06	2925218.88	6.36	13	2.67015e+06	2968547.54	5.97	10	1.26384e+07	13010801.95	29.33	15	3.94555e+06	4264375.05	9.07	14	2.81657e+06	3093623.22	7.15	14	2.32831e+06	2608381.36	6.22	13	1.54868e+06	1795413.76	4.97	12	1.84359e+06	2113597.18	5.90
	Extension efficiency													Difference in Extension efficiency
				cycle					-7
	MgCl2, mM	2	4	10	50	100	2	4	10	50	100
	fold dilution	50	25	10	2	0	50	25	10	2	0				50	25	10	2
	13	44.9567	43.9298	32.2497			56.3072	34.6634	45.1941						56.3072	34.6634	45.1941	0
	12	54.9105	45.3422	55.1564	30.2078		51.1871	39.6136	39.0034	34.1548					51.1871	39.6136	39.0034	34.1548
	11	49.656	43.76	50.8428	32.9389		54.5806	44.2259	47.5367	38.7009	33.9482				20.6324	10.2776	13.5885	4.75268
	10	20.6021	18.6745	13.6081	10.0197		22.6366	14.5134	11.9209	11.0391	10.6173			10	12.0193	3.8961	1.30357	0.421727
	9	34.7238	33.3369	31.6241	29.885	26.129	35.0253	33.4946	32.213	31.3305	29.6517				5.37368	3.84292	2.56139	1.67884
	8	73.939	75.2987	76.6961	76.1332	64.0699	73.1847	73.6807	75.9208	77.7131	75.3077				-2.12304	-1.62701	0.613078	2.40537
	7	85.6537	84.9989	84.9221	86.1635	80.0154	85.8834	85.6172	85.4971	85.7356	84.0445				1.83885	1.57267	1.45256	1.69114
	6	45.3424	44.1706	45.4337	42.9175	29.6543	51.4252	45.6012	43.1236	45.282	43.7255				7.69967	1.8757	-0.601903	1.55648
	5	42.2749	42.4837	42.4753	41.9123	33.8103	44.3279	44.2048	42.8881	42.5094	42.2505				2.07746	1.95434	0.63762	0.258948
	4	68.2391	65.4766	68.9218	68.3222	50.1606	68.9838	68.4309	68.2686	68.1453	68.7736				0.210149	-0.342706	-0.504986	-0.628278
	3	41.1982	42.6485	42.5988	42.6118	32.7801	43.3641	42.7016	41.9146	42.0663	41.6605				1.70357	1.0411	0.254043	0.405808
	2	47.3673	48.1548	47.9077	48.3586	35.6943	48.7357	48.9727	48.3447	48.5087	47.7165				1.01926	1.25621	0.628181	0.792215
	1	91.7904	92.139	93.6433	94.0267	70.6724	90.93	92.8524	93.7786	95.0256	94.0977				-3.16773	-1.24532	-0.319105	0.927896
														up to 9	1.15727	0.560623	0.269935	0.926196
