# Supplementary material for: Rolling circle RNA synthesis catalyzed by RNA
Source: eLife journal article supplement (doi:10.7554/elife.75186), 2022-02-02
Supplement: fig2-figsupp1-data1 [file Source data for Figure 2, Fig. suppl. 1D - Quant. of gel 20190912.xlsx]

## Sheet: Sheet 1
Raw data
Ref Band	Lane 16	Lane 16	Lane 16	Lane 16	Lane 17	Lane 17	Lane 17	Lane 17	Lane 18	Lane 18	Lane 18	Lane 18	Lane 19	Lane 19	Lane 19	Lane 19	Lane 20	Lane 20	Lane 20	Lane 20	Lane 21	Lane 21	Lane 21	Lane 21
Number	Band No	Volume	Vol+BkGnd	Band %	Band No	Volume	Vol+BkGnd	Band %	Band No	Volume	Vol+BkGnd	Band %	Band No	Volume	Vol+BkGnd	Band %	Band No	Volume	Vol+BkGnd	Band %	Band No	Volume	Vol+BkGnd	Band %
16	1	77003.3	3093448.61	0.03	1	104605	3025513.88	0.04	1	46839.8	1900467.66	0.02					1	60884.6	3369066.21	0.02	1	46855.9	2039535.03	0.02
15	2	68944.9	2869009.33	0.03	2	110202	2970326.97	0.04	2	53715.8	2204452.46	0.02					2	54293.5	2731203.18	0.02	2	25136	1585170.13	0.01
14	3	55660.2	2483541.07	0.02	3	117130	2684881.94	0.04	3	76635.9	3107537.85	0.03	1	32082.6	2067615.84	0.01	3	47624.7	2414928.32	0.02	3	27994.6	1746985.18	0.01
13	4	105713	2710893.66	0.04	4	210614	3032453.17	0.08	4	114688	2659821.22	0.05	2	32833.6	1799573.28	0.01	4	90365.8	3218252.06	0.03	4	57710.4	2240458.23	0.02
12	5	101986	3045684.67	0.04	5	204913	2970476.46	0.07	5	106485	2674198.09	0.05	3	50559.3	3111998.01	0.02	5	87797.1	3817827.53	0.03	5	60793.6	2868897.32	0.02
11	6	69950.6	2318302.61	0.03	6	188161	3856757.89	0.07	6	107971	3065562.06	0.05	4	43986.9	2559782.67	0.02	6	79759.2	3173658.74	0.03	6	70123.6	3290484.00	0.02
10	7	167462	3263395.05	0.07	7	251812	3018760.05	0.09	7	176853	2569679.24	0.08	5	104723	3765667.40	0.04	7	126551	3278591.61	0.05	7	119584	2916991.92	0.04
9	8	2.64269e+06	5610279.51	1.09	8	2.73945e+06	6199762.98	0.99	8	1.89821e+06	4470989.93	0.84	6	2.58675e+06	5406958.04	0.95	8	2.24068e+06	5429612.82	0.83	8	1.90085e+06	4755678.95	0.62
8	9	1.02146e+07	13640945.79	4.22	9	8.27225e+06	11946157.57	2.99	9	5.5212e+06	8742259.81	2.45	7	1.00399e+07	13195265.15	3.69	9	7.43514e+06	10663792.86	2.77	9	5.95519e+06	9249595.01	1.94
7	10	9.72491e+06	13372026.70	4.01	10	6.09999e+06	9742212.88	2.21	10	3.39152e+06	6347726.86	1.50	8	8.21105e+06	11409108.13	3.01	10	4.65337e+06	7661750.60	1.73	10	3.37968e+06	6148948.54	1.10
6	11	1.91772e+06	5970656.39	0.79	11	1.70983e+06	5505224.06	0.62	11	1.43505e+06	4868720.05	0.64	9	1700262	4946825.37	0.62	11	1.37565e+06	4613734.48	0.51	11	1.64986e+06	5208572.44	0.54
5	12	6.29185e+06	9300280.56	2.60	12	1.03747e+07	13649195.96	3.75	12	9.58485e+06	12521603.45	4.25	10	7.41442e+06	10730586.40	2.72	12	1.10794e+07	14879848.00	4.13	12	1.34243e+07	16463560.27	4.38
4	13	1.74279e+07	21229289.58	7.19	13	2.51707e+07	29523443.58	9.11	13	2.03556e+07	23860100.22	9.02	11	1.86252e+07	22107727.45	6.84	13	2.38268e+07	28090293.94	8.88	13	2.69553e+07	31267140.67	8.79
3	14	2.42704e+07	28585381.91	10.02	14	2.52494e+07	29530211.59	9.14	14	1.70224e+07	20464326.45	7.54	12	2.91577e+07	33168340.72	10.71	14	2.67984e+07	31453157.38	9.99	14	2.61068e+07	30274255.14	8.51
2	15	5.89826e+07	64384950.71	24.35	15	6.6651e+07	72410819.36	24.12	15	4.86746e+07	53625514.30	21.57	13	7.12557e+07	76341165.80	26.16	15	7.07316e+07	76500202.53	26.36	15	7.46142e+07	80032819.20	24.33
1	16	9.71957e+07	103510203.64	40.12	16	1.11745e+08	118334142.27	40.44	16	8.99076e+07	95529804.01	39.84	14	1.14284e+08	119926164.16	41.96	16	1.12164e+08	118660605.79	41.79	16	1.34735e+08	141084150.98	43.94
Primer	17	1.29257e+07	17440965.20	5.34	17	1.70908e+07	21025102.43	6.19	17	2.72104e+07	31498191.02	12.06	15	8.82099e+06	12080017.56	3.24	17	7.51881e+06	11271506.08	2.80	17	1.75148e+07	23111700.32	5.71
Extension efficiency, %
		50, x50				100, x50				200, x5				50				100				200
16		52.7607				48.6972				46.581								52.8613				65.085
15		72.3919				64.7132				56.7497								70.747				72.0016
14		65.6018				61.1807				60.707				49.4215				64.3061				63.4042
13		75.0832				72.5856				73.2695				56.2164				74.2505				72.1757
12		85.4044				79.8893				78.6759				72.4155				81.0424				75.7033
11		74.1059				78.7936				74.1136				60.3601				76.8762				70.7045
10		19.6607				30.2386				26.4658				9.2666				19.63				17.6782
9		24.3588				32.1899				31.8589				22.116				27.2712				27.9402
8		58.1345				66.6652				70.4934				61.0886				68.7199				70.9747
7		92.3738				91.4547				88.9007				92.5434				91.5355				87.5892
6		79.9868				65.8544				57.4272				75.4624				59.4629				49.7558
5		64.3357				54.6918				52.5174				61.8663				53.4253				49.779
4		66.815				68.7521				71.5782				62.6181				65.624				67.2766
3		55.3566				54.799				55.1661				52.2592				52.4296				51.673
2		57.6148				56.8885				54.7006				56.635				57.001				53.3998
1		94.6641				93.8142				87.9432				96.7613				97.1984				94.2882
	Extension efficiency, %									Extension efficiency, %
		x50 dilution			undiluted					mg vs vol.
		50	100	200	50	100	200				50	100	200
										un diluted	9.2666	19.63	17.6782
	16	52.7607	48.6972	46.581		52.8613	65.085			x50 diluted	19.6607	30.2386	26.4658
	15	72.3919	64.7132	56.7497		70.747	72.0016			dif	2.12168	1.54043	1.49709
	14	65.6018	61.1807	60.707	49.4215	64.3061	63.4042
	13	75.0832	72.5856	73.2695	56.2164	74.2505	72.1757
	12	85.4044	79.8893	78.6759	72.4155	81.0424	75.7033
	11	74.1059	78.7936	74.1136	60.3601	76.8762	70.7045
	10	19.6607	30.2386	26.4658	9.2666	19.63	17.6782
	9	24.3588	32.1899	31.8589	22.116	27.2712	27.9402
	8	58.1345	66.6652	70.4934	61.0886	68.7199	70.9747
	7	92.3738	91.4547	88.9007	92.5434	91.5355	87.5892
	6	79.9868	65.8544	57.4272	75.4624	59.4629	49.7558
	5	64.3357	54.6918	52.5174	61.8663	53.4253	49.779
	4	66.815	68.7521	71.5782	62.6181	65.624	67.2766
	3	55.3566	54.799	55.1661	52.2592	52.4296	51.673
	2	57.6148	56.8885	54.7006	56.635	57.001	53.3998
	1	94.6641	93.8142	87.9432	96.7613	97.1984	94.2882

## Sheet: Sheet 1 (2)
Ref Band	Lane 1	Lane 1	Lane 1	Lane 1	Lane 2	Lane 2	Lane 2	Lane 2	Lane 3	Lane 3	Lane 3	Lane 3	Lane 4	Lane 4	Lane 4	Lane 4	Lane 5	Lane 5	Lane 5	Lane 5	Lane 6	Lane 6	Lane 6	Lane 6	Lane 7	Lane 7	Lane 7	Lane 7	Lane 8	Lane 8	Lane 8	Lane 8	Lane 10	Lane 10	Lane 10	Lane 10	Lane 11	Lane 11	Lane 11	Lane 11	Lane 12	Lane 12	Lane 12	Lane 12	Lane 13	Lane 13	Lane 13	Lane 13	Lane 14
Number	Band No	Volume	Vol+BkGnd	Band %	Band No	Volume	Vol+BkGnd	Band %	Band No	Volume	Vol+BkGnd	Band %	Band No	Volume	Vol+BkGnd	Band %	Band No	Volume	Vol+BkGnd	Band %	Band No	Volume	Vol+BkGnd	Band %	Band No	Volume	Vol+BkGnd	Band %	Band No	Volume	Vol+BkGnd	Band %	Band No	Volume	Vol+BkGnd	Band %	Band No	Volume	Vol+BkGnd	Band %	Band No	Volume	Vol+BkGnd	Band %	Band No	Volume	Vol+BkGnd	Band %	Band No
1
2
3
4	1	97818.7	2580829.64	0.04	1	101380	3159413.84	0.05	1	84382	2735270.71	0.04	1	96692.3	2423645.04	0.03	1	39208.1	2313050.81	0.02	1	44181.9	2725373.09	0.01																	1	17810.7	1221434.92	0.01
5	2	151098	3549568.91	0.06	2	120284	3096930.13	0.06	2	115693	3048078.87	0.05	2	141460	3042264.86	0.05	2	43595.3	2023791.22	0.02	2	52936.6	2300633.47	0.02													1	28742.8	1657156.68	0.01	2	31611.6	2049037.42	0.01	1	19649.6	1590083.15	0.01
6	3	146740	3269578.95	0.06	3	150279	3942884.29	0.07	3	143556	3990337.33	0.06	3	151443	3451977.26	0.05	3	52274.3	2353221.18	0.02	3	62720.9	2413839.67	0.02	1	31052.8	1783903.02	0.01	1	40402.1	2815291.44	0.01					2	56043.6	2924884.52	0.02	3	42160.8	2077123.61	0.02	2	23354.6	1931254.66	0.01
7	4	208202	4673395.39	0.08	4	162488	3885468.20	0.08	4	157991	4307643.50	0.07	4	154100	3195835.45	0.06	4	52445.7	1675344.60	0.02	4	80560.2	2906001.53	0.03	2	44911.1	2338859.04	0.02	2	42893.2	2598562.24	0.01					3	53223.3	3009714.29	0.02	4	39172.7	1885135.68	0.01	3	23878.4	2074236.85	0.01
8	5	352504	5376028.10	0.14	5	265801	4020550.60	0.13	5	232492	3599750.65	0.10	5	270430	3629893.77	0.10	5	137875	2631185.75	0.05	5	175110	3574168.15	0.06	3	84514	3462593.40	0.03	3	90899.5	3145943.54	0.03	1	32955.8	2419804.89	0.01	4	38859	1844134.12	0.01	5	70124.3	2559381.28	0.03	4	32533.7	2028029.23	0.02
9	6	257025	4083645.71	0.10	6	226739	3810984.82	0.11	6	194414	3776314.45	0.08	6	239454	3922902.19	0.09	6	141364	2972734.94	0.05	6	131046	2911671.38	0.04	4	85586.6	3133574.13	0.03	4	74391	2346880.31	0.02	2	131877	3834082.06	0.06	5	79846.2	2401832.97	0.03	6	88731.3	2471443.75	0.03	5	29599	1768983.97	0.02
10	7	250575	3908334.06	0.10	7	197879	3715040.99	0.10	7	183166	3896372.50	0.08	7	217864	3845363.92	0.08	7	128680	3403349.69	0.05	7	128240	3028407.69	0.04	5	89456.7	3077048.91	0.03	5	70749.8	2126680.10	0.02	3	111823	3005842.38	0.05	6	147589	2210195.88	0.05	7	125150	2148407.45	0.05	6	45006.1	2674577.10	0.03
11	8	472453	3959437.30	0.19	8	459485	4432846.46	0.22	8	408992	4067844.75	0.18	8	442234	3713832.98	0.16	8	259475	2928100.97	0.10	8	291686	3792630.87	0.10	6	138656	2894978.70	0.05	6	133144	2729970.76	0.04	4	303038	4639772.47	0.14	7	216875	2804065.34	0.08	8	233577	2513143.06	0.08	7	44889.1	2029466.14	0.03	1
12	9	6.61073e+06	10679513.34	2.61	9	5.62333e+06	9858022.67	2.72	9	5.27449e+06	8694801.54	2.26	9	6.20206e+06	10121716.85	2.22	9	3.5414e+06	6408216.13	1.37	9	4.21503e+06	7950237.03	1.40	7	2.06256e+06	5412515.87	0.70	7	2.27041e+06	5663658.98	0.69	5	1.84198e+06	5368295.68	0.83	8	1.96255e+06	4726474.57	0.71	9	1.91369e+06	4445255.40	0.69	8	665547	3247188.39	0.37	2
13	10	2.00467e+07	24823500.14	7.93	10	1.71667e+07	22317595.93	8.31	10	1.68276e+07	21163004.33	7.22	10	1.82417e+07	22320337.09	6.54	10	1.16909e+07	15513899.15	4.51	10	1.36602e+07	18224547.96	4.53	8	7.10267e+06	11539815.77	2.40	8	7.46441e+06	11419524.97	2.27	6	2.04035e+06	6767672.35	0.92	9	3.66809e+06	6541407.60	1.33	10	5.09564e+06	9025204.88	1.85	9	2.40728e+06	5301575.74	1.35	3
14	11	1.0112e+07	14524452.49	4.00	11	8.05326e+06	12081224.53	3.90	11	8.56716e+06	12480527.42	3.68	11	1.00549e+07	14617849.71	3.61	11	6.98368e+06	10611858.45	2.70	11	7.77491e+06	11420502.50	2.58	9	5.30957e+06	9909720.38	1.80	9	5.47289e+06	9573345.70	1.66	7	679676	5372185.10	0.31	10	1.63461e+06	4549085.47	0.59	11	2.26954e+06	4953942.39	0.82	10	2.05043e+06	4767091.12	1.15	4
15	12	2.20641e+06	6807951.51	0.87	12	1.7826e+06	6320649.01	0.86	12	1.84515e+06	5624624.04	0.79	12	2.15992e+06	6063488.44	0.77	12	1.61011e+06	4871359.79	0.62	12	1.97977e+06	5886647.70	0.66	10	1.49063e+06	5486670.00	0.50	10	1.5409e+06	4732440.25	0.47	8	1.46199e+06	5134148.05	0.66	11	1.34707e+06	4079702.07	0.49	12	1.33369e+06	3595365.65	0.48	11	551009	3452054.50	0.31	5
16	13	1.26999e+07	17390427.23	5.02	13	1.04007e+07	15134886.56	5.03	13	1.15378e+07	15695665.32	4.95	13	1.29666e+07	16948253.38	4.65	13	1.05341e+07	14295677.86	4.07	13	1.21235e+07	15909483.20	4.02	11	9.43132e+06	13404803.75	3.19	11	1.0316e+07	13654907.61	3.14	9	4.95156e+06	8690423.85	2.24	12	7.87954e+06	11668603.48	2.86	13	8456513	10922072.00	3.06	12	3.29855e+06	5752011.61	1.85	6
17	14	2.94002e+07	35360412.01	11.63	14	2.29271e+07	28216473.68	11.09	14	2.63413e+07	31419377.92	11.31	14	3.18943e+07	37728268.00	11.44	14	2.5619e+07	30264910.23	9.89	14	3.11133e+07	36445710.74	10.33	12	2.29167e+07	27380986.36	7.75	12	2.63012e+07	30719503.69	8.00	10	1.02959e+07	14007659.46	4.66	13	1.69514e+07	20341578.77	6.16	14	2.09272e+07	24260387.89	7.58	13	8.48011e+06	11453308.19	4.76	7
18	15	2.55421e+07	31402881.59	10.10	15	2.00308e+07	24971228.64	9.69	15	2.22299e+07	27220662.11	9.54	15	2.71007e+07	32744015.89	9.72	15	2.32532e+07	27828291.00	8.97	15	2.76865e+07	32848829.73	9.19	13	2.40593e+07	28780016.72	8.14	13	2.66129e+07	31190178.58	8.09	11	5.58199e+06	9417510.37	2.53	14	1.02648e+07	13028201.94	3.73	15	1.5573e+07	18956564.76	5.64	14	1.19578e+07	14966360.36	6.72	8
19	16	6.3007e+07	70619404.50	24.92	16	5.13766e+07	58373440.16	24.86	16	5.79766e+07	64523216.22	24.88	16	7.05443e+07	77623160.96	25.30	16	6.59148e+07	71929901.85	25.44	16	7.75716e+07	84547713.64	25.75	14	7.29457e+07	79933815.70	24.68	14	8.12237e+07	87765538.51	24.70	12	3.45617e+07	39754414.37	15.64	15	5.50057e+07	60558506.04	19.99	16	6.10116e+07	66605977.16	22.10	15	3.92163e+07	43967658.68	22.02	9
20	17	7.76836e+07	86009859.28	30.72	17	6.46933e+07	71923004.66	31.30	17	7.70903e+07	84249950.46	33.09	17	9.35502e+07	101306620.07	33.55	17	1.01839e+08	108446410.25	39.30	17	1.16809e+08	124542109.21	38.77	15	1.35319e+08	143165128.95	45.78	15	1.50636e+08	157940663.66	45.81	13	7.82364e+07	85029054.52	35.40	16	1.19142e+08	125161035.94	43.31	17	131213250	137457608.05	47.53	16	8.27848e+07	88139754.77	46.49	10
21	18	3.6376e+06	10554041.37	1.44	18	2.92328e+06	7936472.25	1.41	18	3.78648e+06	8934001.47	1.63	18	4.42089e+06	9370841.92	1.59	18	7.25945e+06	12863855.70	2.80	18	7366248	12737326.39	2.45	16	1.44484e+07	19957738.11	4.89	16	1.65079e+07	21571401.09	5.02	14	8.07649e+07	88742162.98	36.55	17	5.6639e+07	62502140.57	20.59	18	2.7647e+07	32447446.10	10.01	17	2.64304e+07	31054135.75	14.84	11
		4w, 2				4w, 1				3w, 2				3w, 1				2w, 2				2w, 1				1w ,2				1w,1				800				400				200				100
21						100				100				100				100				100				#DIV/0!				#DIV/0!				#DIV/0!				#DIV/0!				100				#DIV/0!
20						100				100				100				100				100				#DIV/0!				#DIV/0!				#DIV/0!				#DIV/0!				100				#DIV/0!
19						100				100				100				100				100				#DIV/0!				#DIV/0!				#DIV/0!				#DIV/0!				100				#DIV/0!
18						100				100				100				100				100				#DIV/0!				#DIV/0!				#DIV/0!				#DIV/0!				100				#DIV/0!
17		0.00193407				0.00245279				0.00181079				0.00173377				0.000756619				0.000733269				#DIV/0!				#DIV/0!				#DIV/0!				0				36.0378				0
16		0.0049216				0.00536295				0.00429349				0.00427027				0.0015979				0.00161184								0				#DIV/0!				0.000522377				53.9644				45.6923
15		0.00782294				0.00899882				0.00737413				0.00698576				0.00260667				0.00265279				0.000525322				0.00061439				#DIV/0!				0.00154092				70.0414				64.2981
14		0.0119395				0.0129301				0.0107645				0.00974891				0.00361874				0.00398981				0.00128509				0.00126666				0				0.00250821				65.0914				67.2753
13		0.0189092				0.0193609				0.0157537				0.0145979				0.00627939				0.00689605				0.00271481				0.00264896				0.000745619				0.00321444				69.3619				77.0578
12		0.0239911				0.0248466				0.0199257				0.0188916				0.00900736				0.00907096				0.00416268				0.00378022				0.00372931				0.00466558				69.8261				74.1376
11		0.0289455				0.0296341				0.0238564				0.022798				0.0114906				0.0111993				0.00567603				0.0048561				0.00625928				0.00734788				63.9729				79.4943
10		0.0382869				0.040751				0.0326331				0.0307277				0.0164978				0.0160403				0.00802167				0.00688081				0.0131155				0.0112894				25.3057				24.7508
9		0.168994				0.176802				0.145821				0.141936				0.084838				0.0859954				0.042914				0.0414067				0.05479				0.046957				33.457				26.869
8		0.565359				0.592136				0.506932				0.469024				0.310444				0.312708				0.16307				0.154917				0.100952				0.113621				77.1382				61.618
7		0.765294				0.786977				0.690779				0.649317				0.445211				0.441745				0.252892				0.238143				0.11633				0.143329				88.1565				90.65
6		0.808919				0.830106				0.730375				0.688047				0.476283				0.474603				0.278109				0.261575				0.149407				0.167811				57.1114				64.1139
5		1.06002				1.08174				0.97797				0.920549				0.679566				0.675811				0.43766				0.418449				0.261435				0.311015				48.5117				52.0134
4		1.64132				1.63644				1.54324				1.49244				1.17395				1.19218				0.825342				0.818408				0.494378				0.619092				72.2987				59.6425
3		2.14634				2.12107				2.02028				1.97838				1.62268				1.65169				1.23235				1.22311				0.620669				0.805645				47.9553				43.0376
2		3.39212				3.36408				3.26443				3.2433				2.89467				2.93911				2.46638				2.45827				1.40262				1.80533				47.1857				45.4036
1		4.92808				4.92927				4.91874				4.92073				4.85991				4.87775				4.75558				4.74897				3.17271				3.97063				89.9862				85.1566
0
			4W, 2	4w, 1	3w, 2	3w, 1	2w, 2	2w, 1	1w, 2	1w, 1	800	400	200	100	50	50, x50	100, x50	200, x50	50	100	200	GAA
		21
	23	20																				0.00302282
	22	19																				0.00553277
	21	18																				0.00788716
	20	17	0.00193407	0.00245279	0.00181079	0.00173377	0.000756619	0.000733269					36.0378									0.0100597
4.24779	19	16	0.0049216	0.00536295	0.00429349	0.00427027	0.0015979	0.00161184				0.000522377	53.9644	45.6923		52.7607	48.6972	46.581		52.8613	65.085	0.0133419
3.9823	18	15	0.00782294	0.00899882	0.00737413	0.00698576	0.00260667	0.00265279	0.000525322	0.00061439		0.00154092	70.0414	64.2981		72.3919	64.7132	56.7497		70.747	72.0016	0.0168221
3.71681	17	14	0.0119395	0.0129301	0.0107645	0.00974891	0.00361874	0.00398981	0.00128509	0.00126666		0.00250821	65.0914	67.2753		65.6018	61.1807	60.707	49.4215	64.3061	63.4042	0.0207766
3.45133	16	13	0.0189092	0.0193609	0.0157537	0.0145979	0.00627939	0.00689605	0.00271481	0.00264896	0.000745619	0.00321444	69.3619	77.0578		75.0832	72.5856	73.2695	56.2164	74.2505	72.1757	0.0273836
3.18584	15	12	0.0239911	0.0248466	0.0199257	0.0188916	0.00900736	0.00907096	0.00416268	0.00378022	0.00372931	0.00466558	69.8261	74.1376		85.4044	79.8893	78.6759	72.4155	81.0424	75.7033	0.0340817
2.92035	14	11	0.0289455	0.0296341	0.0238564	0.022798	0.0114906	0.0111993	0.00567603	0.0048561	0.00625928	0.00734788	63.9729	79.4943		74.1059	78.7936	74.1136	60.3601	76.8762	70.7045	0.03921
2.65487	13	10	0.0382869	0.040751	0.0326331	0.0307277	0.0164978	0.0160403	0.00802167	0.00688081	0.0131155	0.0112894	25.3057	24.7508	7.61864	19.6607	30.2386	26.4658	9.2666	19.63	17.6782	0.0499447
2.38938	12	9	0.168994	0.176802	0.145821	0.141936	0.084838	0.0859954	0.042914	0.0414067	0.05479	0.046957	33.457	26.869	14.9596	24.3588	32.1899	31.8589	22.116	27.2712	27.9402	0.165128
2.12389	11	8	0.565359	0.592136	0.506932	0.469024	0.310444	0.312708	0.16307	0.154917	0.100952	0.113621	77.1382	61.618	36.0933	58.1345	66.6652	70.4934	61.0886	68.7199	70.9747	0.49285
1.85841	10	7	0.765294	0.786977	0.690779	0.649317	0.445211	0.441745	0.252892	0.238143	0.11633	0.143329	88.1565	90.65	86.7368	92.3738	91.4547	88.9007	92.5434	91.5355	87.5892	0.650466
1.59292	9	6	0.808919	0.830106	0.730375	0.688047	0.476283	0.474603	0.278109	0.261575	0.149407	0.167811	57.1114	64.1139	78.6242	79.9868	65.8544	57.4272	75.4624	59.4629	49.7558	0.690184
1.32743	8	5	1.06002	1.08174	0.97797	0.920549	0.679566	0.675811	0.43766	0.418449	0.261435	0.311015	48.5117	52.0134	65.2185	64.3357	54.6918	52.5174	61.8663	53.4253	49.779	0.942526
1.06195	7	4	1.64132	1.63644	1.54324	1.49244	1.17395	1.19218	0.825342	0.818408	0.494378	0.619092	72.2987	59.6425	64.6458	66.815	68.7521	71.5782	62.6181	65.624	67.2766	1.49317
0.79646	6	3	2.14634	2.12107	2.02028	1.97838	1.62268	1.65169	1.23235	1.22311	0.620669	0.805645	47.9553	43.0376	45.3378	55.3566	54.799	55.1661	52.2592	52.4296	51.673	1.94838
0.530973	5	2	3.39212	3.36408	3.26443	3.2433	2.89467	2.93911	2.46638	2.45827	1.40262	1.80533	47.1857	45.4036	37.7872	57.6148	56.8885	54.7006	56.635	57.001	53.3998	3.18257
0.265487	4	1	4.92808	4.92927	4.91874	4.92073	4.85991	4.87775	4.75558	4.74897	3.17271	3.97063	89.9862	85.1566	72.2813	94.6641	93.8142	87.9432	96.7613	97.1984	94.2882	4.87269
																						1	2	3	4																							1	2
	time corse		1	2	3	4		sd					slope								22																										22
																					21																										21
	4.51327	20		0.000744944	0.00177228	0.00481552			1.65108e-05	5.44607e-05	0.00454899										20																										20		0
	4.24779	19		0.00160487	0.00428188	0.0078755			9.8545e-06	1.64226e-05	0.00473922										19		0.000744944	0.00177228	0.00481552																						19		0.00588814
	3.9823	18	0.000569856	0.00262973	0.00717995	0.0112146		6.29803e-05	3.26141e-05	0.00027462	0.00489167		0.00330504								18		0.00160487	0.00428188	0.0078755																						18	0	0.0126851
	3.71681	17	0.00127587	0.00380428	0.0102567	0.0152154		1.30273e-05	0.000262389	0.000718163	0.00484153		0.00449043								17	0.000569856	0.00262973	0.00717995	0.0112146																						17	0.00546363	0.0207857
	3.45133	16	0.00268189	0.00658772	0.0151758	0.0218846		4.65645e-05	0.000436039	0.000817246	0.00476767		0.00624697								16	0.00127587	0.00380428	0.0102567	0.0152154																						16	0.0122328	0.0300695
	3.18584	15	0.00397145	0.00903916	0.0194086	0.0276398		0.000270446	4.49691e-05	0.000731275	0.0055952		0.0077186								15	0.00268189	0.00658772	0.0151758	0.0218846																						15	0.0257132	0.0520703
	2.92035	14	0.00526606	0.0113449	0.0233272	0.0325965		0.000579777	0.000205962	0.000748354	0.00573773		0.00903057								14	0.00397145	0.00903916	0.0194086	0.0276398																						14	0.0380772	0.0714468
	2.65487	13	0.00745124	0.0162691	0.0316804	0.0429942		0.000806709	0.000323503	0.00134736	0.00614412		0.0121146								13	0.00526606	0.0113449	0.0233272	0.0325965																						13	0.0504897	0.089672
	2.38938	12	0.0421604	0.0854167	0.143878	0.170308		0.00106584	0.000818428	0.00274727	0.00594718		0.050859								12	0.00745124	0.0162691	0.0316804	0.0429942																						12	0.0714406	0.128593
	2.12389	11	0.158994	0.311576	0.487978	0.550115		0.00576511	0.0016013	0.0268049	0.0513682		0.164492								11	0.0421604	0.0854167	0.143878	0.170308																						11	0.404223	0.675146
	1.85841	10	0.245518	0.443478	0.670048	0.734245		0.0104296	0.002451	0.0293178	0.0733611		0.212265								10	0.158994	0.311576	0.487978	0.550115																						10	1.52439	2.46274
	1.59292	9	0.269842	0.475443	0.709211	0.776403		0.0116916	0.00118799	0.0299307	0.0754156		0.219684								9	0.245518	0.443478	0.670048	0.734245																						9	2.35396	3.50532
	1.32743	8	0.428054	0.677688	0.94926	1.0281		0.0135841	0.00265517	0.0406026	0.0748971		0.260603								8	0.269842	0.475443	0.709211	0.776403																						8	2.58718	3.75797
	1.06195	7	0.821875	1.18307	1.51784	1.59031		0.00490314	0.0128941	0.0359203	0.0841651		0.347983								7	0.428054	0.677688	0.94926	1.0281																						7	4.10407	5.35654
	0.79646	6	1.22773	1.63718	1.99933	2.07193		0.00653938	0.020511	0.0296287	0.107738		0.3858								6	0.821875	1.18307	1.51784	1.59031																						6	7.87992	9.35113
	0.530973	5	2.46232	2.91689	3.25386	3.31292		0.00573835	0.0314214	0.0149414	0.113754		0.39577								5	1.22773	1.63718	1.99933	2.07193																						5	11.7712	12.9405
	0.265487	4	4.75227	4.86883	4.91974	4.91001		0.00467452	0.0126112	0.00140403	0.0323306		0.0837331								4	2.46232	2.91689	3.25386	3.31292																						4	23.6081	23.0555
																					3	4.75227	4.86883	4.91974	4.91001																						3	45.5635	38.4839
																																																100	100
																																		6.88259
	triplet titration		quantify 20190904 gel
					2w
11.3		pmol	800	400	200	100	50															106088	71990.1	77374.6
0.0493382	3.18584	12	44.0688	33.8241	44.0148																	134645	140847	98417.9	47568.8
-0.021145	2.92035	11	54.8329	51.7701	59.6555	35.7099																198298	198282	118887	85640.4	38542.5
-0.0916282	2.65487	10	33.1635	29.6327	31.591	30.5553	17.8175															884807	976262	638116	302752	177776
-0.162111	2.38938	9	58.9952	44.7629	41.5299	31.1626	22.4497															920137	1.71202e+06	1.31329e+06	963027	747251
-0.232595	2.12389	8	86.5244	80.2358	75.5223	63.1578	40.7766															349485	763464	727983	816081	1.39947e+06
-0.303078	1.85841	7	76.9139	85.2333	86.3875	88.6948	84.1076															778439	669240	468639	282337	446503
-0.373561	1.59292	6	59.5656	57.2889	58.6956	62.6526	78.3436															2.28892e+06	3.37887e+06	2.42265e+06	1.48871e+06	776638
-0.444044	1.32743	5	52.3131	49.4615	50.0292	50.9698	68.3508															5.16022e+06	8.08323e+06	5.8585e+06	3.83442e+06	1.66055e+06
-0.514527	1.06195	4	80.9398	75.9479	74.7099	61.4534	64.2467															2.54821e+06	5.06523e+06	3.96866e+06	4.90542e+06	2.9198e+06
-0.585011	0.79646	3	45.2307	47.5636	52.3494	47.2497	46.232															1.61886e+07	2.3217e+07	1.4284e+07	1.42075e+07	9.49769e+06
-0.655494	0.530973	2	45.8904	47.7624	49.5857	48.3746	38.1421															3.48518e+07	4.8425e+07	3.04774e+07	2.87433e+07	2.86474e+07
-0.725977	0.265487	1	63.7455	81.7059	91.5814	87.662	71.856															3.66323e+07	2.0756e+07	5.55723e+06	7.83626e+06	1.8139e+07
	mg vs vol.
		50	100	200																		0.0131019	0.0122282	0.0141309	0.00686412	0.00335634
	un diluted	9.2666	19.63	17.6782
	x50 diluted	19.6607	30.2386	26.4658
	dif	2.12168	1.54043	1.49709
	Rz	1	5	10
	surface	5	5	5
	reaction vol	1	5	10
	buffer	10	5	1
	I see that
	the Mg amount/size of eutectic phase is not dramatically affecting the efficiency
	that increasing the dilution improves the invasion effect
	in conclusion
	It might be the surface that causes the improved effect
	from gel 20190916			4w
	22	19	GAA	CGG	GAC
	21	18
4.51327	20	17	77.3543
4.24779	19	16	78.9776
3.9823	18	15	77.9564
3.71681	17	14	72.4762
3.45133	16	13	80.336
3.18584	15	12	85.5013
2.92035	14	11	75.6991
2.65487	13	10	25.1113		11.5211
2.38938	12	9	30.702	24.8252	39.8356
2.12389	11	8	75.5037	79.69	85.5876
1.85841	10	7	94.9645	59.8795	77.4182
1.59292	9	6	72.5978	55.3856	65.2384
1.32743	8	5	63.6775	68.9446	60.7203
1.06195	7	4	76.5805	73.5662	53.6075
0.79646	6	3	62.498	16.6589	26.374
0.530973	5	2	66.5081	22.4478	33.6613
0.265487	4	1	97.9142	68.8974	39.5477
[truncated: 31 more columns]

## Sheet: Sheet2
		Michalis menten
	t		0	1	2	3	4	5		sd
	x+1	10	0	0.00745124	0.0162691	0.0316804	0.0429942			0.000806709	0.000323503	0.00134736	0.00614412
	x	9	0	0.0421604	0.0854167	0.143878	0.170308			0.00106584	0.000818428	0.00274727	0.00594718
	k			0.176736	0.0952334	0.0733962	0.0631123
	slope			0.00813453	0.0121146	0.0133626
		[x+1]=[x]*k*t
		k=[x+1]/([x]*t)
										rate
										x	0.0421604	0.0854167	0.143878	0.170308
												substrate
