# Supplementary material for: Rolling circle RNA synthesis catalyzed by RNA
Source: eLife journal article supplement (doi:10.7554/elife.75186), 2022-02-02
Supplement: fig4-data1 [file Source data for Figure 4, Analysis of deep-sequencing reads.xlsx]

## Sheet: Sheet1
	Template topology	Circular
	Template name	A																B																C
	Expected triplet	ATA	GAA	GAA	CCA	GAA	GAA	CCC	GAA	GAA	CTG	GAA	GAA	ATA	GAA	GAA	CCA	AAA	GAA	GAA	CAC	GAA	GAA	GGG	GAA	GAA	CTG	GAA	GAA	AAA	GAA	GAA	CAC	TTA	GAA	GAA	TCC	GAA	GAA	GGC	GAA	GAA	CTG	GAA	GAA	TTA	GAA	GAA	TCC
	Position	3	4	5	6	7	8	9	10	11	12	13	14	15	16	17	18	3	4	5	6	7	8	9	10	11	12	13	14	15	16	17	18	3	4	5	6	7	8	9	10	11	12	13	14	15	16	17	18
Readout triplet	CTG	0	0.00188573	0	0.328052	0.0140687	0	0.430108	1.56965	0	86.747	0	0	0				0	0.00139384	0	0.0587051	0	0	0.0443529	0.324262	0.275634	49.298	0	0	0				0	0.000227637	0	0.00171243	0	0	0.00247469	0.474178	0.0820661	37.7427	0.187617	0	0	0	0	0
	ATA	100	0	0	0	0	0	0	0	0	0	0	0	0				0	0.00139384	0	0	0	0	0.00316807	0.0115808	0	0	0	0	0				0	0	0.00188885	0	0.000500915	0.0005161	0	0.0237089	0.0144823	0	0	0	0	0	0	0
	CCA	0	0	0.0374317	50.4502	0	0	0.860215	1.37345	0.497512	1.20482	0	0	0				0	0.00418153	0	0.11741	0.00255024	0	0.0095042	0.196873	0.16538	9.67239	0	0	0				0	0.00159346	0.000236106	0.0159011	0.00150275	0.0010322	0.000274965	0.686972	0.0965484	5.33981	0	0	0	0	0	0
	CCC	0	0.00188573	0.0124772	0.732882	0	0	96.2151	1.04644	0.497512	0	0	0	100				0	0.00278769	0.00148063	0.127893	0	0	0.00316807	2.44354	2.53583	2.34009	0.636943	0	0				0	0.000682911	0.000472212	1.18182	0.000250458	0.00077415	0.00357455	0.74522	0.477915	0.849515	0.375235	1.08108	0	0	0	0
	AAA	0	0.0584575	0.0623861	0.0139597	0.0703433	0.131234	0	0	0	0	0	0	0				100	0.0710861	0.0533025	0.00628984	0.0841579	0.066999	0	0.0347423	0.110254	0.156006	0	0	0				0	0.0917377	0.0849981	0	0.105443	0.0588354	0	0.0588332	0.057929	0	0	0	0	0	0	0
	CAC	0	0.00565718	0	2.20563	0	0	0	0.0654022	0	0	0	0	0				0	0.00278769	0.00888376	83.1432	0.00255024	0.0107198	0	0.0463231	0.330761	4.83619	0	0	0				0	0.00295928	0.000944423	0.0183474	0.0017532	0.0041288	0.00137483	0.366463	0.0965484	1.63835	0	0	0	0	0	0
	GGG	0	0.599661	1.9714	0.0977176	0.393922	2.09974	0	3.20471	5.97015	0	13.2075	8.33333	0				0	0.183988	0.774367	0.0146763	0.408038	2.91044	73.195	18.0428	11.3561	0	28.0255	12.5	0				0	0.0489419	0.144497	0.00513728	0.14201	0.53597	2.60062	6.68503	4.10331	1.57767	16.8856	12.4324	0	16.6667	0	0
	TTA	0	0	0	0.0628185	0	0	0	0	0	0	0	0	0				0	0	0	0.00419322	0	0	0	0	0	0.156006	0	0	0				100	0.000227637	0	0.000489264	0	0.00025805	0.000274965	0.0263432	0.0434468	0.242718	0	0	50	0	0	0
	TCC	0	0.00377145	0.00748634	33.4683	0	0	0.0860215	0.0654022	0	0	0	0	0				0	0.00418153	0.00444188	0.163536	0	0	0.00633613	0.457441	0.0551268	0.624025	0	0	0				0	0.000682911	0.0141663	98.6401	0	0	0.00219972	0.141668	0.46826	3.45874	0	0	7.14286	0	0	100
	GGC	0	21.4482	58.4982	3.71327	33.5115	43.3508	0.817204	75.932	44.2786	1.20482	64.1509	66.6667	0				0	4.49654	27.0969	1.15943	3.39692	11.3443	26.3456	58.1644	41.6759	0.936037	55.414	62.5	50				0	2.21309	1.36965	0.0797501	1.77825	4.60103	96.7428	78.4597	73.8692	9.58738	44.2777	40.5405	0	66.6667	0	0
	ATC	0	0	0.00249545	0.0488588	0	0	0	0.196207	0	0	0	0	0				0	0	0.00296125	0.00419322	0.00255024	0.00267996	0.00316807	0.15055	0.275634	5.92824	0	0	50				0	0	0.00377769	0.0200598	0	0.00025805	0.00109986	0.1885	0.125513	3.09466	0	0	42.8571	0	0	0
	GAT	0	1.01829	2.01382	7.77553	0.450197	1.9685	0.0430108	0.58862	5.47264	0	0	16.6667	0				0	0.245317	0.978694	0.0587051	0.0994593	0.410034	0.300966	5.81355	4.79603	0.780031	3.18471	12.5	0				0	0.3237	0.699817	0.025931	0.0879107	0.329272	0.485314	2.95366	10.3259	8.98058	0.938086	17.8378	0	0	0	0
	CGC	0	0.0697718	0.122277	0.872479	0.0703433	0.0874891	1.54839	1.50425	0.497512	10.8434	0	0	0				0	0.0125446	0.0755119	15.1292	0.00765072	0.0187597	0.0506891	0.804864	0.441014	25.117	1.91083	0	0				0	0.00682911	0.0040138	0.00709433	0.00300549	0.00799955	0.133358	2.32376	0.724113	25.3034	1.87617	0	0	0	0	0
	GAA	0	76.7924	37.272	0.230334	65.4896	52.3622	0	14.4539	42.7861	0	22.6415	8.33333	0				0	94.9738	71.0034	0.0125797	95.9961	85.2361	0.0380168	13.509	37.9824	0.156006	10.828	12.5	0				0	97.3093	97.6755	0.00366948	97.8794	94.4599	0.0266717	6.86592	9.51484	2.18447	35.4597	28.1081	0	16.6667	100	0
Number of reads	n	54257	53030	40073	14327	7108	4572	2325	1529	201	83	53	12	1	0	0	0	72773	71744	67539	47696	39212	37314	31565	17270	1814	641	157	16	2	0	0	0	443353	439296	423539	408777	399269	387522	363682	341644	20715	1648	533	185	14	6	1	1
	Template topology	Linear
	Template name	A																B																C
	Expected triplet	ATA	GAA	GAA	CCA	GAA	GAA	CCC	GAA	GAA	CTG	GAA	GAA	ATA	GAA	GAA	CCA	AAA	GAA	GAA	CAC	GAA	GAA	GGG	GAA	GAA	CTG	GAA	GAA	AAA	GAA	GAA	CAC	TTA	GAA	GAA	TCC	GAA	GAA	GGC	GAA	GAA	CTG	GAA	GAA	TTA	GAA	GAA	TCC
	Position	3	4	5	6	7	8	9	10	11	12	13	14	15	16	17	18	3	4	5	6	7	8	9	10	11	12	13	14	15	16	17	18	3	4	5	6	7	8	9	10	11	12	13	14	15	16	17	18
Readout triplet	CTG	0	0.00186207	0.0140433	0.490688	0.00531858	0.00815129	0.0879176	0.442913	0	0							0	0.0035706	0.00335018	0.100707	0.00211685	0	0.0186672	0.721562	0	0							0	0.000446161	0.000957104	0.00122345	0.0021207	0.00044307	0.00239146	0.201008	0.094399	0.554529	0	0	0
	ATA	100	0	0.00234055	0.00743467	0	0	0	0.0164042	0	0							0	0.00089265	0.000558363	0	0	0	0	0.0424448	0	0							0	0.000446161	0.000669973	0.000407815	0.00021207	0	0	0.0831217	0	0	0	0	100
	CCA	0	0.023462	0.0725571	36.3667	0.0106372	0.0326052	0.615423	0.377297	0	0							0	0.00937282	0.0195427	0.30684	0.0084674	0.00521608	0.00311119	0.594228	0	0							0	0.00258774	0.00287131	0.0354799	0.00286295	0.00321226	0.000455517	0.217969	1.41598	0.184843	0	0	0
	CCC	0	0.00968274	0.0157987	1.36612	0.00531858	0.0163026	96.2447	0.082021	0	0							0	0.00401692	0.00335018	0.352473	0.00211685	0	0	8.14941	0	0							0	0.000892323	0.00229705	2.24635	0.00021207	0.00044307	0.0027331	0.118247	0.566394	0.64695	0	0	0
	AAA	0	0.0357517	0.0280866	0.0130107	0.0265929	0.00815129	0	0.147638	0	0							100	0.0406156	0.0195427	0.00472062	0.0656224	0.070417	0	0	0	0							0	0.0648718	0.0488123	0.000509769	0.0923566	0.0496238	0.000113879	0.264161	0.094399	0	0	0	0
	CAC	0	0.00633102	0.00877706	1.23787	0.00531858	0.0244539	0.263753	0.0164042	0	0							0	0.00223162	0.0223345	76.9429	0	0.00521608	0.00622239	0.127334	0	0							0	0.00232004	0.00325416	0.0194732	0.00159053	0.00797526	0.00136655	0.151327	1.44745	0.462107	0	0	0
	GGG	0	0.115076	0.372733	0.128248	0.170195	0.285295	0.0125597	1.42717	0	0							0	0.180762	0.238421	0.0676622	0.0952583	0.127794	20.8823	5.7725	10.5263	0							0	0.0210588	0.021152	0.0026508	0.0146328	0.0103014	0.11479	2.63536	0.220264	0.739372	0	0	0
	TTA	0	0.00111724	0.0105325	0.072488	0	0.00815129	0	0.0164042	0	0							0	0.0017853	0.00335018	0.0236031	0.00211685	0	0	0.0424448	0	0							100	0.000624626	0.000287131	0.00244689	0	0.000110767	0	0.0143147	0.0314663	0.369686	0	0	0
	TCC	0	0.0167586	0.129315	48.2845	0.0265929	0.130421	0.452148	0.131234	0	0							0	0.0156214	0.0346185	0.374502	0.00635055	0.00521608	0.00933358	1.06112	0	20							0	0.0177572	0.0762812	97.3283	0.00137846	0.000664605	0.00125267	0.124502	0.912524	7.48614	0	0	0
	GGC	0	33.1414	63.1644	6.15405	32.6189	32.0427	1.5574	93.8156	54.5455	100							0	17.9177	60.6522	6.77409	17.2375	14.5476	78.2994	78.6078	52.6316	60							0	4.93142	3.42519	0.252947	3.0501	1.6593	99.6447	91.9364	49.0245	82.0702	25	66.6667	0
	ATC	0	0.00633102	0.0392042	0.0353147	0.00531858	0.0244539	0.0125597	0.688976	0	0							0	0.0071412	0.0156342	0.0283237	0.00211685	0.00260804	0.015556	0.509338	0	0							0	0.000178465	0.00717828	0.033237	0.00042414	0.000110767	0.00170819	0.937435	0.125865	0.277264	0	0	0
	GAT	0	1.25987	3.10474	3.58723	0.569088	1.41017	0.037679	0.787402	18.1818	0							0	0.498545	3.0012	0.25334	0.230737	0.451191	0.544459	1.91002	0	20							0	0.603656	1.06143	0.0305862	0.111443	0.231393	0.0633168	1.08479	10.73	3.23475	0	0	0
	CGC	0	0.136303	0.282621	0.775064	0.0744602	0.25269	0.439588	1.5584	0	0							0	0.0812311	0.140149	14.1776	0.0402202	0.0495527	0.108892	1.6129	0	0							0	0.0172218	0.015218	0.0189634	0.00646814	0.00697835	0.16	1.60638	0.849591	1.38632	0	0	0
	GAA	0	65.246	32.7548	1.48136	66.4823	65.7564	0.276312	0.492126	27.2727	0							0	81.2365	35.8458	0.593224	82.3074	84.7352	0.112003	0.848896	36.8421	0							0	94.3365	95.3344	0.0274256	96.7162	98.0294	0.00717439	0.625037	34.4871	2.5878	75	33.3333	0
Number of reads	n	278594	268519	170900	53802	18802	12268	7962	6096	22	6	0	0	0	0	0	0	228911	224052	179095	63551	47240	38343	32142	2356	19	5	0	0	0	0	0	0	1132075	1120671	1044818	980836	943084	902792	878124	831311	3178	1082	4	3	1	0	0	0
[truncated: 16 more columns]
