# Supplementary material for: Rolling circle RNA synthesis catalyzed by RNA
Source: eLife journal article supplement (doi:10.7554/elife.75186), 2022-02-02
Supplement: fig5-data1 [file Source data for Figure 5, Analysis of deep-sequencing reads.xlsx]

## Sheet: Sheet1
									Sequences in List
	Triplet position	expected triplet (DNA)	Product I (AUA)	Product II (CGC)	sum		Product I	30	GGAAGAACTGGAAGAACGCGAAGAACTGGAAGAAATAGAAGAACTGGAAGAACGCGAAGAACTGGAAGAAATAGAAGAACTGGAAGAACGCGAAGAACTGGTCGAATAT
	30	CTG	0	0	0			29	GGAAGAACTGGAAGAACGCGAAGAACTGGAAGAAATAGAAGAACTGGAAGAACGCGAAGAACTGGAAGAAATAGAAGAACTGGAAGAACGCGAAGAAGTCGAATAT
	29	GAA	0	2	2			28	GGAAGAACTGGAAGAACGCGAAGAACTGGAAGAAATAGAAGAACTGGAAGAACGCGAAGAACTGGAAGAAATAGAAGAACTGGAAGAACGCGAAGTCGAATAT
	28	GAA	0	6	6			27	GGAAGAACTGGAAGAACGCGAAGAACTGGAAGAAATAGAAGAACTGGAAGAACGCGAAGAACTGGAAGAAATAGAAGAACTGGAAGAACGCGTCGAATAT
	27	ATA/CGC	5	262	267			26	GGAAGAACTGGAAGAACGCGAAGAACTGGAAGAAATAGAAGAACTGGAAGAACGCGAAGAACTGGAAGAAATAGAAGAACTGGAAGAAGTCGAATAT
	26	GAA	4	2	6			25	GGAAGAACTGGAAGAACGCGAAGAACTGGAAGAAATAGAAGAACTGGAAGAACGCGAAGAACTGGAAGAAATAGAAGAACTGGAAGTCGAATAT
	25	GAA	1	2	3			24	GGAAGAACTGGAAGAACGCGAAGAACTGGAAGAAATAGAAGAACTGGAAGAACGCGAAGAACTGGAAGAAATAGAAGAACTGGTCGAATAT
	24	CTG	169	692	861			23	GGAAGAACTGGAAGAACGCGAAGAACTGGAAGAAATAGAAGAACTGGAAGAACGCGAAGAACTGGAAGAAATAGAAGAAGTCGAATAT
	23	GAA	526	105	631			22	GGAAGAACTGGAAGAACGCGAAGAACTGGAAGAAATAGAAGAACTGGAAGAACGCGAAGAACTGGAAGAAATAGAAGTCGAATAT
	22	GAA	1828	131	1959			21	GGAAGAACTGGAAGAACGCGAAGAACTGGAAGAAATAGAAGAACTGGAAGAACGCGAAGAACTGGAAGAAATAGTCGAATAT
	21	ATA/CGC	5619	5285	10904			20	GGAAGAACTGGAAGAACGCGAAGAACTGGAAGAAATAGAAGAACTGGAAGAACGCGAAGAACTGGAAGAAGTCGAATAT
	20	GAA	379	10158	10537			19	GGAAGAACTGGAAGAACGCGAAGAACTGGAAGAAATAGAAGAACTGGAAGAACGCGAAGAACTGGAAGTCGAATAT
	19	GAA	221	1458	1679			18	GGAAGAACTGGAAGAACGCGAAGAACTGGAAGAAATAGAAGAACTGGAAGAACGCGAAGAACTGGTCGAATAT
	18	CTG	1925	7063	8988			17	GGAAGAACTGGAAGAACGCGAAGAACTGGAAGAAATAGAAGAACTGGAAGAACGCGAAGAAGTCGAATAT
	17	GAA	3717	45193	48910			16	GGAAGAACTGGAAGAACGCGAAGAACTGGAAGAAATAGAAGAACTGGAAGAACGCGAAGTCGAATAT
	16	GAA	2976	113856	116832			15	GGAAGAACTGGAAGAACGCGAAGAACTGGAAGAAATAGAAGAACTGGAAGAACGCGTCGAATAT
	15	ATA/CGC	9676	178282	187958			14	GGAAGAACTGGAAGAACGCGAAGAACTGGAAGAAATAGAAGAACTGGAAGAAGTCGAATAT
	14	GAA	6784	5783	12567			13	GGAAGAACTGGAAGAACGCGAAGAACTGGAAGAAATAGAAGAACTGGAAGTCGAATAT
	13	GAA	547	2716	3263			12	GGAAGAACTGGAAGAACGCGAAGAACTGGAAGAAATAGAAGAACTGGTCGAATAT
	12	CTG	1979	12764	14743			11	GGAAGAACTGGAAGAACGCGAAGAACTGGAAGAAATAGAAGAAGTCGAATAT
	11	GAA	6323	8213	14536			10	GGAAGAACTGGAAGAACGCGAAGAACTGGAAGAAATAGAAGTCGAATAT
	10	GAA	14248	5196	19444			9	GGAAGAACTGGAAGAACGCGAAGAACTGGAAGAAATAGTCGAATAT
	9	ATA/CGC	16008	27298	43306		Product II	30	GGAAGAACTGGAAGAAATAGAAGAACTGGAAGAACGCGAAGAACTGGAAGAAATAGAAGAACTGGAAGAACGCGAAGAACTGGAAGAAATAGAAGAACTGGTCGAATAT
								29	GGAAGAACTGGAAGAAATAGAAGAACTGGAAGAACGCGAAGAACTGGAAGAAATAGAAGAACTGGAAGAACGCGAAGAACTGGAAGAAATAGAAGAAGTCGAATAT
								28	GGAAGAACTGGAAGAAATAGAAGAACTGGAAGAACGCGAAGAACTGGAAGAAATAGAAGAACTGGAAGAACGCGAAGAACTGGAAGAAATAGAAGTCGAATAT
								27	GGAAGAACTGGAAGAAATAGAAGAACTGGAAGAACGCGAAGAACTGGAAGAAATAGAAGAACTGGAAGAACGCGAAGAACTGGAAGAAATAGTCGAATAT
								26	GGAAGAACTGGAAGAAATAGAAGAACTGGAAGAACGCGAAGAACTGGAAGAAATAGAAGAACTGGAAGAACGCGAAGAACTGGAAGAAGTCGAATAT
								25	GGAAGAACTGGAAGAAATAGAAGAACTGGAAGAACGCGAAGAACTGGAAGAAATAGAAGAACTGGAAGAACGCGAAGAACTGGAAGTCGAATAT
								24	GGAAGAACTGGAAGAAATAGAAGAACTGGAAGAACGCGAAGAACTGGAAGAAATAGAAGAACTGGAAGAACGCGAAGAACTGGTCGAATAT
								23	GGAAGAACTGGAAGAAATAGAAGAACTGGAAGAACGCGAAGAACTGGAAGAAATAGAAGAACTGGAAGAACGCGAAGAAGTCGAATAT
								22	GGAAGAACTGGAAGAAATAGAAGAACTGGAAGAACGCGAAGAACTGGAAGAAATAGAAGAACTGGAAGAACGCGAAGTCGAATAT
								21	GGAAGAACTGGAAGAAATAGAAGAACTGGAAGAACGCGAAGAACTGGAAGAAATAGAAGAACTGGAAGAACGCGTCGAATAT
								20	GGAAGAACTGGAAGAAATAGAAGAACTGGAAGAACGCGAAGAACTGGAAGAAATAGAAGAACTGGAAGAAGTCGAATAT
								19	GGAAGAACTGGAAGAAATAGAAGAACTGGAAGAACGCGAAGAACTGGAAGAAATAGAAGAACTGGAAGTCGAATAT
								18	GGAAGAACTGGAAGAAATAGAAGAACTGGAAGAACGCGAAGAACTGGAAGAAATAGAAGAACTGGTCGAATAT
								17	GGAAGAACTGGAAGAAATAGAAGAACTGGAAGAACGCGAAGAACTGGAAGAAATAGAAGAAGTCGAATAT
								16	GGAAGAACTGGAAGAAATAGAAGAACTGGAAGAACGCGAAGAACTGGAAGAAATAGAAGTCGAATAT
								15	GGAAGAACTGGAAGAAATAGAAGAACTGGAAGAACGCGAAGAACTGGAAGAAATAGTCGAATAT
								14	GGAAGAACTGGAAGAAATAGAAGAACTGGAAGAACGCGAAGAACTGGAAGAAGTCGAATAT
								13	GGAAGAACTGGAAGAAATAGAAGAACTGGAAGAACGCGAAGAACTGGAAGTCGAATAT
								12	GGAAGAACTGGAAGAAATAGAAGAACTGGAAGAACGCGAAGAACTGGTCGAATAT
								11	GGAAGAACTGGAAGAAATAGAAGAACTGGAAGAACGCGAAGAAGTCGAATAT
								10	GGAAGAACTGGAAGAAATAGAAGAACTGGAAGAACGCGAAGTCGAATAT
								9	GGAAGAACTGGAAGAAATAGAAGAACTGGAAGAACGCGTCGAATAT
